# Supplementary material for: Functional In Vivo Screening Identifies microRNAs Regulating Metastatic Dissemination of Prostate Cancer Cells to Bone Marrow
Source: MDPI journal article supplement (doi:10.3390/cancers15153892), 2023-07-31
Supplement: s1 [file cancers-2466399-supplementary.pdf › cancers-2466399-supplementary.pdf]

## Supplementary Figures

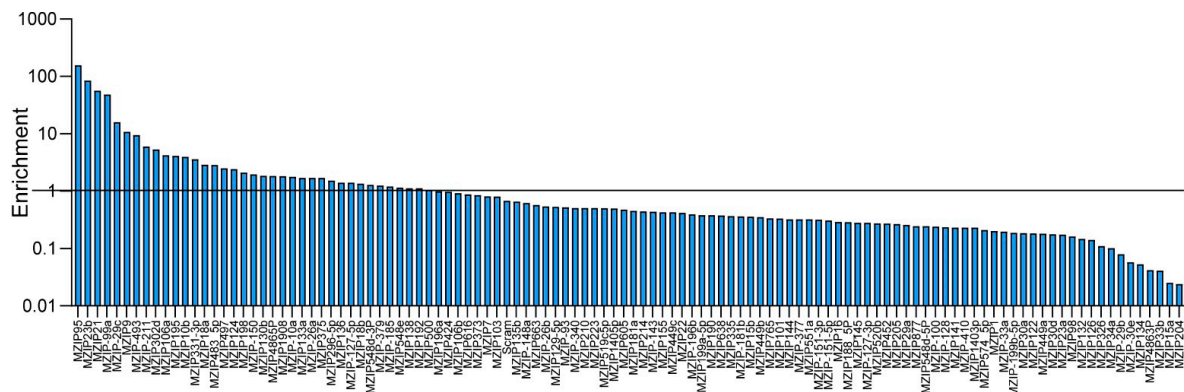

**Supplementary Figure S1. Enrichment of miRZIPs in primary tumours.** Average fold enrichment of specific anti-miRNA inserts in primary tumours compared to injected pool.

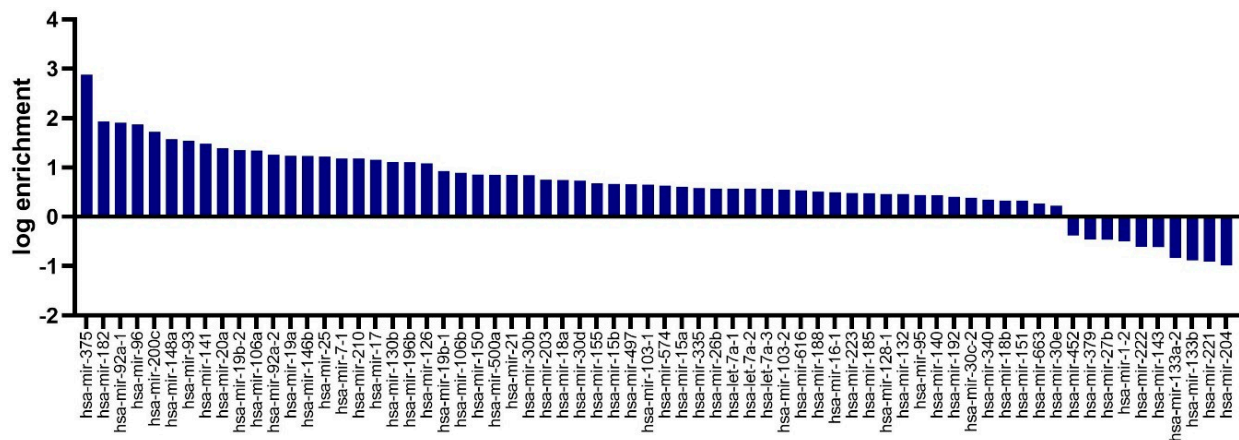

**Supplementary Figure S2. Enrichment of miRNAs in primary tumours vs normal.** Log fold enrichment of miRNAs targeted by the anti-miRNA in the miRZIP™ lentivirus library in the TCGA PRAD dataset with 52 pairs of tumour and normal prostate tissues.



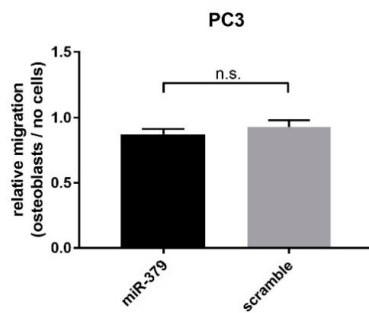

**Supplementary Figure S 5.** No different of migration in PC3 cell transiently transfected with anti-miR-379 or scrambled towards osteoblasts as attractant.

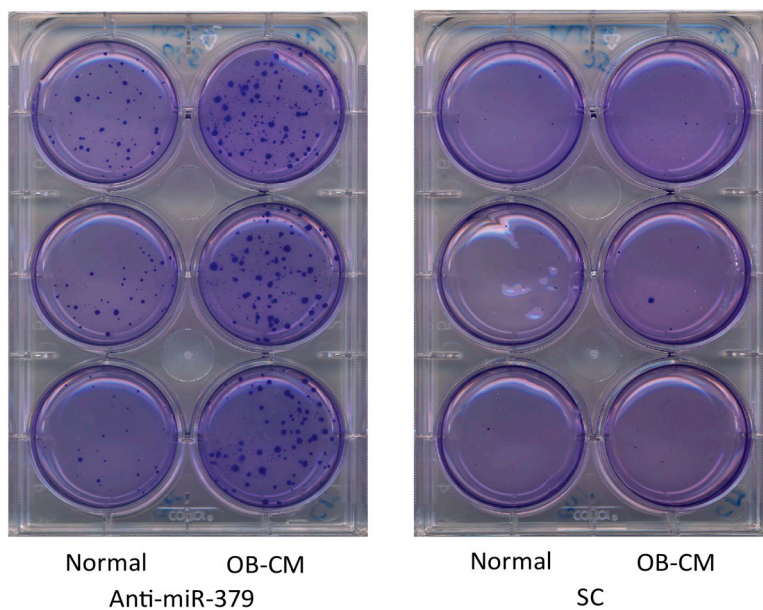

**Supplementary Figure S 6.** Increased colony formation can be seen in a soft agar colony forming assay for 22Rv1-anti-miR-379 compared to 22Rv1-SC, in OB-CM, but not in normal growth media.

## Supplementary Tables

**Supplementary Table S1.** Primer sequences used for PCR amplification and sequencing.

| Primer |         | Sequence                       |
|--------|---------|--------------------------------|
| miRZip | Forward | 5'-TGCATGTCGCTATGTGTTCTGGGA-3' |
|        | Reverse | 5'-CTCCCAGGCTCAGATCTGGTCTAA-3' |
| EXT    | Forward | 5'-CTGTGAGGGACAGGGGAGT-3'      |
|        | Reverse | 5'-TTCCCTAGTTAGCCAGAGAGC-3'    |

**Supplementary Table S2.** Presence of anti-miR in PC3 cells at injection and in the primary tumours

| <b>LB PC3</b> |          | <b>Primary PC3 tumours</b> |                  |
|---------------|----------|----------------------------|------------------|
|               | <b>%</b> |                            | <b>average %</b> |
| MZIP144       | 9,985317 | MZIP-493                   | 13,1978          |
| MZIP135b      | 9,693607 | MZIP195                    | 7,2454           |
| MZIP-127-5p   | 4,446044 | MZIP23b                    | 7,0084           |
| MZIP424       | 3,846034 | MZIP135b                   | 6,3830           |
| MZIP23a       | 3,547236 | MZIP-127-5p                | 6,2245           |
| MZIP-26b      | 3,469705 | MZIP-26a                   | 5,4732           |
| MZIP-26a      | 3,205435 | MZIP548d-3P                | 4,1227           |
| MZIP-340      | 3,202016 | MZIP10b                    | 3,7572           |
| MZIP548d-3P   | 3,189641 | MZIP424                    | 3,7532           |
| MZIP129-5p    | 2,373082 | MZIP144                    | 3,2487           |
| MZIP-410      | 2,316244 | MZIP-379                   | 2,7694           |
| MZIP-379      | 2,205485 | MZIP136                    | 2,7025           |
| MZIP190       | 2,177363 | MZIP-99a                   | 1,9751           |
| MZIP452       | 2,130165 | MZIP-26b                   | 1,8945           |
| MZIP136       | 1,921182 | MZIP548e                   | 1,8807           |
| MZIP15b       | 1,919747 | MZIP375                    | 1,8127           |
| MZIP195       | 1,765186 | MZIP18b                    | 1,7158           |
| MZIP-29b      | 1,650052 | MZIP-340                   | 1,6297           |
| MZIP-100      | 1,634919 | MZIP7                      | 1,2687           |
| MZIP548e      | 1,629085 | MZIP129-5p                 | 1,2677           |
| MZIP7         | 1,560898 | Scram                      | 0,9747           |
| MZIP638       | 1,531294 | MZIP196a                   | 0,9570           |
| Scram         | 1,434847 | MZIP4865P                  | 0,9355           |
| MZIP-493      | 1,389769 | MZIP500                    | 0,9231           |
| MZIP548d-5P   | 1,283295 | MZIP-150                   | 0,8370           |
| MZIP1405p     | 1,28309  | MZIP190                    | 0,8288           |
| MZIP18b       | 1,265975 | MZIP-29c                   | 0,8115           |
| MZIP-128      | 1,177733 | MZIP9                      | 0,7971           |
| MZIP204       | 1,125384 | MZIP15b                    | 0,6909           |
| MZIP-143      | 1,121465 | MZIP192                    | 0,6575           |
| MZIP375       | 1,067794 | MZIP1405p                  | 0,6380           |
| MZIP155       | 1,02618  | MZIP23a                    | 0,6214           |
| MZIP196a      | 0,95797  | MZIP452                    | 0,5778           |
| MZIP10b       | 0,949971 | MZIP638                    | 0,5770           |
| MZIP500       | 0,875289 | MZIP-410                   | 0,5378           |
| MZIP877       | 0,87162  | MZIP130b                   | 0,5330           |
| MZIP101       | 0,768313 | MZIP1908                   | 0,5231           |
| MZIP551a      | 0,702041 | MZIP-143                   | 0,4959           |
| MZIP-127-3p   | 0,639437 | MZIP155                    | 0,4404           |
| MZIP519c5p    | 0,634423 | MZIP-100                   | 0,3948           |
| MZIP-151-5p   | 0,627176 | MZIP-211                   | 0,3483           |
| MZIP214       | 0,5947   | MZIP519c5p                 | 0,3189           |
| MZIP192       | 0,581368 | MZIP548d-5P                | 0,3133           |

|             |          |             |        |
|-------------|----------|-------------|--------|
| MZIP-93     | 0,537042 | MZIP-93     | 0,2804 |
| MZIP335     | 0,53547  | MZIP-128    | 0,2782 |
| MZIP449a    | 0,513364 | MZIP214     | 0,2651 |
| MZIP4865P   | 0,508281 | MZIP103     | 0,2587 |
| MZIP-377    | 0,504772 | MZIP124     | 0,2583 |
| MZIP181a    | 0,488158 | MZIP101     | 0,2568 |
| MZIP449b    | 0,459375 | MZIP331-3p  | 0,2292 |
| MZIP-150    | 0,426739 | MZIP551a    | 0,2266 |
| MZIP-33a    | 0,363133 | MZIP181a    | 0,2222 |
| MZIP205     | 0,334555 | MZIP877     | 0,2144 |
| MZIP29a     | 0,332959 | MZIP335     | 0,1957 |
| MZIP103     | 0,320151 | MZIP133a    | 0,1935 |
| MZIP605     | 0,305224 | MZIP-151-5p | 0,1931 |
| MZIP574_5p  | 0,295516 | MZIP-127-3p | 0,1789 |
| MZIP130b    | 0,286377 | MZIP198     | 0,1752 |
| MZIP98      | 0,286035 | MZIP95      | 0,1743 |
| MZIP1908    | 0,285921 | MZIP-377    | 0,1641 |
| MZIP1403p   | 0,282275 | MZIP449b    | 0,1630 |
| MZIP141     | 0,237083 | MZIP605     | 0,1450 |
| MZIP1       | 0,199046 | MZIP-29b    | 0,1314 |
| MZIP-181b   | 0,169397 | MZIP483_5p  | 0,1308 |
| MZIP30a     | 0,149159 | MZIP138     | 0,1236 |
| MZIP616     | 0,138198 | MZIP616     | 0,1211 |
| MZIP-151-3p | 0,129742 | MZIP449a    | 0,0933 |
| MZIP145     | 0,122267 | MZIP205     | 0,0893 |
| MZIP133a    | 0,113265 | MZIP29a     | 0,0859 |
| MZIP138     | 0,109163 | MZIP106b    | 0,0824 |
| MZIP210     | 0,108229 | MZIP497     | 0,0785 |
| MZIP124     | 0,10595  | MZIP-33a    | 0,0717 |
| MZIP106b    | 0,08904  | MZIP1403p   | 0,0653 |
| MZIP198     | 0,083548 | MZIP574_5p  | 0,0622 |
| MZIP23b     | 0,082887 | MZIP-181b   | 0,0616 |
| MZIP132     | 0,074067 | MZIP141     | 0,0551 |
| MZIP9       | 0,073497 | MZIP210     | 0,0549 |
| MZIP449c    | 0,07336  | MZIP98      | 0,0464 |
| MZIP663     | 0,071742 | MZIP-185    | 0,0416 |
| MZIP520b    | 0,069714 | MZIP663     | 0,0414 |
| MZIP34a     | 0,068483 | MZIP-151-3p | 0,0413 |
| MZIP331-3p  | 0,063584 | MZIP1       | 0,0404 |
| MZIP4863P   | 0,062399 | MZIP373     | 0,0380 |
| MZIP223     | 0,060188 | MZIP145     | 0,0343 |
| MZIP-211    | 0,058296 | MZIP-148a   | 0,0322 |
| MZIP126     | 0,052462 | MZIP449c    | 0,0314 |
| MZIP-148a   | 0,051915 | MZIP223     | 0,0305 |
| MZIP-29c    | 0,051004 | MZIP30a     | 0,0278 |

|              |          |              |        |
|--------------|----------|--------------|--------|
| MZIP-199b-5p | 0,049203 | MZIP204      | 0,0270 |
| MZIP483_5p   | 0,045739 | MZIP520b     | 0,0191 |
| MZIP373      | 0,044417 | MZIP22       | 0,0168 |
| MZIP-99a     | 0,040703 | MZIP132      | 0,0109 |
| MZIP22       | 0,040042 | MZIP16       | 0,0097 |
| MZIP326      | 0,034709 | MZIP-199b-5p | 0,0092 |
| MZIP-185     | 0,034618 | MZIP126      | 0,0075 |
| MZIP16       | 0,033296 | MZIP34a      | 0,0070 |
| MZIP497      | 0,031404 | MZIP296-5p   | 0,0065 |
| MZIP30d      | 0,028419 | MZIP30d      | 0,0050 |
| MZIP302a     | 0,025935 | MZIP122      | 0,0044 |
| MZIP122      | 0,023793 | MZIP326      | 0,0039 |
| MZIP134      | 0,018847 | MZIP765      | 0,0037 |
| MZIP33b      | 0,014859 | MZIP18a      | 0,0027 |
| MZIP765      | 0,011099 | MZIP4863P    | 0,0026 |
| MZIP296-5p   | 0,004262 | MZIP21       | 0,0026 |
| MZIP15a      | 0,002302 | MZIP30b      | 0,0025 |
| MZIP199a-3p  | 0,00139  | MZIP302d     | 0,0024 |
| MZIP95       | 0,001117 | MZIP188_3P   | 0,0011 |
| MZIP18a      | 0,000934 | MZIP134      | 0,0010 |
| MZIP188_5P   | 0,000501 | MZIP106a     | 0,0010 |
| MZIP302d     | 0,000456 | MZIP92a      | 0,0010 |
| MZIP-10a     | 0,000342 | MZIP675      | 0,0009 |
| MZIP106a     | 0,000228 | MZIP-10a     | 0,0006 |
| MZIP-196b    | 0,000205 | MZIP33b      | 0,0006 |
| MZIP-130a    | 0,000137 | MZIP27b      | 0,0006 |
| MZIP-30e     | 0,000114 | MZIP302c     | 0,0003 |
| MZIP20a      | 4,56E-05 | MZIP188_5P   | 0,0001 |
| MZIP21       | 4,56E-05 | MZIP-196b    | 0,0001 |
| Bullet34a3   | 4,56E-05 | MZIP15a      | 0,0001 |
| MZIP17       | 2,28E-05 | MZIP27a      |        |
| MZIP199a-5p  | 2,28E-05 | MZIP200a     |        |
| MZIP206      | 2,28E-05 | MZIP203      |        |
| MZIP367      | 2,28E-05 | MZIP199a-5p  |        |
| MZIP371-5p   | 2,28E-05 | MZIP-30e     |        |
| MZIP-99b     | 2,28E-05 | MZIP302b     |        |
| MZIPlet7a    | 2,28E-05 | Bullet34a3   |        |
| redo2963p    | 2,28E-05 | MZIP-130a    |        |
| MZIP125a-3p  |          | MZIP17       |        |
| MZIP125a-5p  |          | MZIP199a-3p  |        |
| MZIP125b     |          | MZIP206      |        |
| MZIP133b     |          | MZIP20a      |        |
| MZIP146a     |          | MZIP302a     |        |
| MZIP-146b_3p |          | MZIP367      |        |
| MZIP-146b_5p |          | MZIP371-5p   |        |

**Supplementary Table S3.** Ago2-immunoprecipitation in 22Rv1-anti-miR-379 and 22Rv1-SC grown in normal medium followed by RNA-seq

|       | Gene_stable_ID  | Gene_name  | baseMean | log2FoldChange | lfcSE    | stat     | pvalue   | padj     |
|-------|-----------------|------------|----------|----------------|----------|----------|----------|----------|
| 183   | ENSG00000139793 | MBNL2      | 133,3749 | 10,46614       | 1,223672 | 8,553063 | 1,20E-17 | 6,98E-15 |
| 1179  | ENSG00000152093 | CFC1B      | 20,46278 | 7,764163       | 1,369288 | 5,670219 | 1,43E-08 | 2,48E-06 |
| 3168  | ENSG00000100979 | PLTP       | 212,274  | 7,704553       | 0,999817 | 7,705962 | 1,30E-14 | 5,44E-12 |
| 6445  | ENSG00000003436 | TFPI       | 115,7615 | 7,68264        | 0,828867 | 9,26884  | 1,88E-20 | 1,82E-17 |
| 9374  | ENSG00000167757 | KLK11      | 18,72523 | 7,627635       | 1,416777 | 5,383795 | 7,29E-08 | 1,09E-05 |
| 2267  | ENSG00000213973 | ZNF99      | 34,4881  | 7,55011        | 1,260472 | 5,989906 | 2,10E-09 | 4,33E-07 |
| 1596  | ENSG00000196109 | ZNF676     | 16,66177 | 7,466542       | 1,41117  | 5,291031 | 1,22E-07 | 1,68E-05 |
| 5472  | ENSG00000275778 | AC018630.6 | 15,7923  | 7,391085       | 1,457377 | 5,0715   | 3,95E-07 | 4,26E-05 |
| 4368  | ENSG00000182836 | PLCXD3     | 15,55588 | 7,367392       | 1,507693 | 4,886535 | 1,03E-06 | 9,89E-05 |
| 10544 | ENSG00000166866 | MYO1A      | 15,23688 | 7,337367       | 1,445415 | 5,076304 | 3,85E-07 | 4,23E-05 |
| 1047  | ENSG00000184735 | DDX53      | 14,00745 | 7,219231       | 1,465973 | 4,924531 | 8,46E-07 | 8,39E-05 |
| 4115  | ENSG00000163331 | DAPL1      | 13,67177 | 7,186214       | 1,476062 | 4,868504 | 1,12E-06 | 0,000107 |
| 1735  | ENSG00000172000 | ZNF556     | 12,18047 | 7,002937       | 1,497148 | 4,677517 | 2,90E-06 | 0,000236 |
| 6544  | ENSG00000127903 | ZNF835     | 11,9995  | 6,991157       | 1,477775 | 4,730866 | 2,24E-06 | 0,000188 |
| 2919  | ENSG00000116106 | EPHA4      | 11,96913 | 6,976722       | 1,532392 | 4,552832 | 5,29E-06 | 0,00039  |
| 11967 | ENSG00000123689 | G0S2       | 11,06279 | 6,875555       | 1,517779 | 4,530011 | 5,90E-06 | 0,000425 |
| 13264 | ENSG00000213931 | HBE1       | 10,69538 | 6,823267       | 1,672431 | 4,07985  | 4,51E-05 | 0,002126 |
| 12407 | ENSG00000139117 | CPNE8      | 10,43528 | 6,789937       | 1,525035 | 4,452317 | 8,49E-06 | 0,000571 |
| 12494 | ENSG00000283599 | BX276092.9 | 10,17828 | 6,747705       | 1,524978 | 4,42479  | 9,65E-06 | 0,000635 |
| 3646  | ENSG00000164294 | GPX8       | 18,45359 | 6,690037       | 1,377572 | 4,856397 | 1,20E-06 | 0,000112 |
| 9119  | ENSG00000172238 | ATOH1      | 9,023084 | 6,585822       | 1,596125 | 4,126133 | 3,69E-05 | 0,001804 |
| 1129  | ENSG00000185015 | CA13       | 52,46534 | 6,574366       | 0,903061 | 7,280091 | 3,34E-13 | 1,15E-10 |
| 1209  | ENSG00000160321 | ZNF208     | 8,978449 | 6,568616       | 1,572897 | 4,176126 | 2,97E-05 | 0,001495 |
| 14564 | ENSG00000122176 | FMOD       | 8,880677 | 6,552994       | 1,564558 | 4,188399 | 2,81E-05 | 0,001448 |
| 8398  | ENSG00000135744 | AGT        | 8,594976 | 6,494884       | 1,65078  | 3,934434 | 8,34E-05 | 0,00348  |
| 1559  | ENSG00000137959 | IFI44L     | 8,072791 | 6,428647       | 1,688154 | 3,808092 | 0,00014  | 0,005422 |
| 13589 | ENSG00000054803 | CBLN4      | 23,65591 | 6,373586       | 1,211384 | 5,26141  | 1,43E-07 | 1,92E-05 |
| 6781  | ENSG00000074276 | CDHR2      | 7,108395 | 6,236867       | 1,702638 | 3,663061 | 0,000249 | 0,008561 |
| 8186  | ENSG00000165841 | CYP2C19    | 6,547781 | 6,121831       | 1,717196 | 3,565017 | 0,000364 | 0,011231 |
| 11031 | ENSG00000156113 | KCNMA1     | 6,597426 | 6,115242       | 1,734443 | 3,525768 | 0,000422 | 0,012515 |
| 3241  | ENSG00000189366 | ALG1L      | 23,26371 | 6,081129       | 1,183927 | 5,136406 | 2,80E-07 | 3,29E-05 |
| 1850  | ENSG00000163406 | SLC15A2    | 6,371951 | 6,072187       | 1,805397 | 3,363352 | 0,00077  | 0,019649 |
| 1125  | ENSG00000164879 | CA3        | 6,306376 | 6,068506       | 1,705139 | 3,55895  | 0,000372 | 0,011389 |
| 13148 | ENSG00000167080 | B4GALNT2   | 6,153461 | 6,035957       | 1,753017 | 3,443183 | 0,000575 | 0,015946 |
| 5637  | ENSG00000145934 | TENM2      | 5,962557 | 5,990182       | 1,751345 | 3,420333 | 0,000625 | 0,016776 |
| 14697 | ENSG00000108576 | SLC6A4     | 5,989465 | 5,985689       | 1,729594 | 3,460747 | 0,000539 | 0,015193 |
| 12213 | ENSG00000186458 | DEFB132    | 5,899619 | 5,972701       | 1,759614 | 3,394325 | 0,000688 | 0,018143 |
| 11245 | ENSG00000013297 | CLDN11     | 9,891493 | 5,793929       | 1,461071 | 3,965535 | 7,32E-05 | 0,003185 |
| 12589 | ENSG00000198429 | ZNF69      | 5,151416 | 5,757698       | 1,857831 | 3,099151 | 0,001941 | 0,03818  |
| 8180  | ENSG00000276490 | AL583836.1 | 5,108239 | 5,752117       | 1,804719 | 3,187264 | 0,001436 | 0,030688 |
| 11390 | ENSG00000176920 | FUT2       | 5,075702 | 5,733876       | 1,897894 | 3,021178 | 0,002518 | 0,046458 |

|       |                 |          |          |          |          |          |          |          |
|-------|-----------------|----------|----------|----------|----------|----------|----------|----------|
| 1002  | ENSG00000058866 | DGKG     | 4,8891   | 5,678494 | 1,88083  | 3,019143 | 0,002535 | 0,046521 |
| 8441  | ENSG00000112343 | TRIM38   | 35,71206 | 5,625926 | 0,933142 | 6,029012 | 1,65E-09 | 3,45E-07 |
| 8876  | ENSG00000145242 | EPHA5    | 80,47684 | 5,60998  | 0,621793 | 9,022258 | 1,84E-19 | 1,45E-16 |
| 14414 | ENSG00000260903 | XKR7     | 56,52827 | 5,365176 | 0,728094 | 7,3688   | 1,72E-13 | 6,41E-11 |
| 10510 | ENSG00000168939 | SPRY3    | 13,81027 | 5,190061 | 1,312558 | 3,954158 | 7,68E-05 | 0,003309 |
| 9273  | ENSG00000102401 | ARMCX3   | 13,46612 | 5,159975 | 1,306395 | 3,949781 | 7,82E-05 | 0,003359 |
| 2948  | ENSG00000123407 | HOXC12   | 22,17955 | 5,15874  | 1,016635 | 5,07433  | 3,89E-07 | 4,24E-05 |
| 7104  | ENSG00000156959 | LHFPL4   | 8,773301 | 4,993788 | 1,457038 | 3,427356 | 0,000609 | 0,016563 |
| 14113 | ENSG00000186197 | EDARADD  | 57,23044 | 4,993007 | 0,726918 | 6,868737 | 6,48E-12 | 1,77E-09 |
| 533   | ENSG00000139209 | SLC38A4  | 415,4146 | 4,854914 | 0,296349 | 16,38245 | 2,55E-60 | 1,14E-56 |
| 9460  | ENSG00000180938 | ZNF572   | 7,201414 | 4,718999 | 1,548865 | 3,046746 | 0,002313 | 0,043467 |
| 13067 | ENSG00000268089 | GABRQ    | 49,48479 | 4,587899 | 0,651772 | 7,039116 | 1,93E-12 | 6,03E-10 |
| 5911  | ENSG00000152661 | GJA1     | 355,7329 | 4,527202 | 0,290902 | 15,56266 | 1,31E-54 | 4,37E-51 |
| 2209  | ENSG00000167034 | NKX3-1   | 1585,413 | 4,492652 | 0,255421 | 17,58918 | 2,98E-69 | 3,99E-65 |
| 6911  | ENSG00000102362 | SYTL4    | 15,58733 | 4,468153 | 1,052866 | 4,243798 | 2,20E-05 | 0,001211 |
| 3964  | ENSG00000197696 | NMB      | 52,28179 | 4,387254 | 0,628172 | 6,984161 | 2,87E-12 | 8,73E-10 |
| 7829  | ENSG00000158715 | SLC45A3  | 561,9937 | 4,369654 | 0,264988 | 16,49002 | 4,33E-61 | 2,90E-57 |
| 8173  | ENSG00000040731 | CDH10    | 85,59076 | 4,362138 | 0,541032 | 8,062631 | 7,47E-16 | 3,45E-13 |
| 3079  | ENSG00000100867 | DHRS2    | 83,34401 | 4,360932 | 1,12748  | 3,867858 | 0,00011  | 0,004352 |
| 8127  | ENSG00000112818 | MEP1A    | 19,55128 | 4,353878 | 0,990132 | 4,397268 | 1,10E-05 | 0,00069  |
| 13263 | ENSG00000131771 | PPP1R1B  | 27,5182  | 4,312968 | 0,899291 | 4,795962 | 1,62E-06 | 0,000142 |
| 1269  | ENSG00000186998 | EMID1    | 12,22494 | 4,305494 | 1,332131 | 3,232035 | 0,001229 | 0,027444 |
| 9674  | ENSG00000115616 | SLC9A2   | 121,0838 | 4,298747 | 0,453462 | 9,479841 | 2,55E-21 | 3,79E-18 |
| 12344 | ENSG00000184838 | PRR16    | 54,66006 | 4,293354 | 0,702078 | 6,115206 | 9,64E-10 | 2,12E-07 |
| 2279  | ENSG00000128917 | DLL4     | 8,175278 | 4,200604 | 1,352293 | 3,106283 | 0,001895 | 0,037705 |
| 7027  | ENSG00000145555 | MYO10    | 10,82391 | 4,165844 | 1,237364 | 3,36671  | 0,000761 | 0,019598 |
| 8483  | ENSG00000123095 | BHLHE41  | 172,8001 | 4,140588 | 0,447131 | 9,260343 | 2,04E-20 | 1,82E-17 |
| 5617  | ENSG00000046774 | MAGEC2   | 24,41948 | 4,118748 | 0,880483 | 4,67783  | 2,90E-06 | 0,000236 |
| 426   | ENSG00000090104 | RGS1     | 23,6117  | 4,079261 | 0,899162 | 4,536735 | 5,71E-06 | 0,000418 |
| 9464  | ENSG00000262543 | SMIM28   | 11,47506 | 4,071557 | 1,177886 | 3,456667 | 0,000547 | 0,015296 |
| 3183  | ENSG00000197757 | HOXC6    | 22,28304 | 4,017097 | 0,942282 | 4,26316  | 2,02E-05 | 0,001154 |
| 8226  | ENSG00000188375 | H3F3C    | 10,94251 | 3,983815 | 1,146789 | 3,473886 | 0,000513 | 0,014591 |
| 12303 | ENSG00000131037 | EPS8L1   | 13,30027 | 3,718739 | 1,146271 | 3,244205 | 0,001178 | 0,026608 |
| 8210  | ENSG00000132855 | ANGPTL3  | 9,069638 | 3,717334 | 1,241702 | 2,99374  | 0,002756 | 0,049424 |
| 14490 | ENSG00000163485 | ADORA1   | 10,91228 | 3,631255 | 1,170189 | 3,103137 | 0,001915 | 0,037948 |
| 5344  | ENSG00000026950 | BTN3A1   | 21,96597 | 3,546462 | 1,047039 | 3,387133 | 0,000706 | 0,018516 |
| 10726 | ENSG00000131459 | GFPT2    | 19,12633 | 3,546448 | 0,835591 | 4,24424  | 2,19E-05 | 0,001211 |
| 4299  | ENSG00000136383 | ALPK3    | 14,69783 | 3,531566 | 0,987328 | 3,57689  | 0,000348 | 0,010935 |
| 13356 | ENSG00000189056 | RELN     | 64,90758 | 3,382654 | 0,489825 | 6,905846 | 4,99E-12 | 1,45E-09 |
| 13310 | ENSG00000104863 | LIN7B    | 47,67865 | 3,323299 | 0,653259 | 5,087262 | 3,63E-07 | 4,06E-05 |
| 8786  | ENSG00000180745 | CLRN3    | 12,1213  | 3,291213 | 1,052906 | 3,125837 | 0,001773 | 0,036044 |
| 3883  | ENSG00000121005 | CRISPLD1 | 97,85031 | 3,283081 | 0,542224 | 6,054837 | 1,41E-09 | 2,99E-07 |
| 10307 | ENSG00000157510 | AFAP1L1  | 14,52125 | 3,27824  | 0,999672 | 3,279314 | 0,001041 | 0,024631 |
| 133   | ENSG00000134121 | CHL1     | 19,36973 | 3,221459 | 0,984544 | 3,27203  | 0,001068 | 0,025053 |
| 4875  | ENSG00000196208 | GREB1    | 17,05028 | 3,205975 | 0,921868 | 3,477695 | 0,000506 | 0,014447 |



|       |                 |          |          |          |          |          |          |          |
|-------|-----------------|----------|----------|----------|----------|----------|----------|----------|
| 7771  | ENSG00000182107 | TMEM30B  | 14,95183 | 3,201307 | 0,936709 | 3,417611 | 0,000632 | 0,016893 |
| 738   | ENSG00000148584 | AICF     | 30,25651 | 3,197906 | 0,717166 | 4,459086 | 8,23E-06 | 0,00056  |
| 11530 | ENSG00000106004 | HOXA5    | 25,46567 | 3,161475 | 0,72741  | 4,346206 | 1,39E-05 | 0,000843 |
| 4791  | ENSG00000182601 | HS3ST4   | 37,4991  | 3,155222 | 0,657648 | 4,797737 | 1,60E-06 | 0,000142 |
| 11309 | ENSG00000269437 | NXF2B    | 30,11102 | 3,154196 | 0,657595 | 4,796565 | 1,61E-06 | 0,000142 |
| 12130 | ENSG00000184371 | CSF1     | 31,86448 | 3,116765 | 0,646909 | 4,817932 | 1,45E-06 | 0,000132 |
| 2127  | ENSG00000184408 | KCND2    | 14,19055 | 3,09274  | 0,937827 | 3,297774 | 0,000975 | 0,023398 |
| 11538 | ENSG00000106006 | HOXA6    | 19,42477 | 3,081928 | 0,833842 | 3,696055 | 0,000219 | 0,007821 |
| 14150 | ENSG00000063015 | SEZ6     | 25,63209 | 3,048346 | 0,73059  | 4,172442 | 3,01E-05 | 0,001509 |
| 6355  | ENSG00000152217 | SETBP1   | 17,59616 | 2,984331 | 0,846581 | 3,525156 | 0,000423 | 0,012517 |
| 8941  | ENSG00000116833 | NR5A2    | 21,72242 | 2,951723 | 0,820499 | 3,597471 | 0,000321 | 0,010474 |
| 12385 | ENSG00000143469 | SYT14    | 19,8303  | 2,90186  | 0,876807 | 3,309578 | 0,000934 | 0,022718 |
| 2747  | ENSG00000146376 | ARHGAP18 | 22,41405 | 2,877755 | 0,866906 | 3,319572 | 0,000902 | 0,022202 |
| 13909 | ENSG00000129646 | QRICH2   | 47,61997 | 2,870742 | 0,648313 | 4,42802  | 9,51E-06 | 0,000631 |
| 1698  | ENSG00000178171 | AMER3    | 157,0235 | 2,832341 | 0,337681 | 8,387636 | 4,96E-17 | 2,56E-14 |
| 6449  | ENSG00000257704 | INAFM1   | 43,34119 | 2,830148 | 0,576539 | 4,90886  | 9,16E-07 | 8,94E-05 |
| 2175  | ENSG00000113389 | NPR3     | 39,21947 | 2,756641 | 0,604496 | 4,560227 | 5,11E-06 | 0,000378 |
| 8030  | ENSG00000189057 | FAM111B  | 701,4826 | 2,72655  | 0,295191 | 9,236565 | 2,55E-20 | 2,13E-17 |
| 5357  | ENSG00000186310 | NAPIL3   | 26,27444 | 2,637426 | 0,701844 | 3,757854 | 0,000171 | 0,006378 |
| 3128  | ENSG00000163536 | SERPINI1 | 26,62712 | 2,62679  | 0,67789  | 3,874952 | 0,000107 | 0,004252 |
| 14269 | ENSG00000175602 | CCDC85B  | 20,41588 | 2,622992 | 0,845957 | 3,100622 | 0,001931 | 0,038102 |
| 10586 | ENSG00000140443 | IGF1R    | 72,66273 | 2,607544 | 0,456018 | 5,718076 | 1,08E-08 | 1,90E-06 |
| 10697 | ENSG00000084710 | EFR3B    | 41,87302 | 2,575147 | 0,655044 | 3,931259 | 8,45E-05 | 0,003516 |
| 10284 | ENSG00000170667 | RASA4B   | 20,73692 | 2,568696 | 0,798269 | 3,217831 | 0,001292 | 0,028529 |
| 3428  | ENSG00000178573 | MAF      | 110,3967 | 2,549348 | 0,369567 | 6,898207 | 5,27E-12 | 1,50E-09 |
| 2769  | ENSG00000120549 | KIAA1217 | 25,83211 | 2,500581 | 0,700829 | 3,568032 | 0,00036  | 0,011154 |
| 9112  | ENSG00000182263 | FIGN     | 27,88551 | 2,481228 | 0,635719 | 3,903027 | 9,50E-05 | 0,003904 |
| 12889 | ENSG00000099812 | MISP     | 28,19368 | 2,480694 | 0,822462 | 3,016182 | 0,00256  | 0,046785 |
| 14277 | ENSG00000198648 | STK39    | 374,76   | 2,470197 | 0,332671 | 7,425355 | 1,12E-13 | 4,43E-11 |
| 7956  | ENSG00000125170 | DOK4     | 26,42379 | 2,456596 | 0,704731 | 3,485863 | 0,000491 | 0,014073 |
| 10516 | ENSG00000132688 | NES      | 155,167  | 2,439376 | 0,420733 | 5,797921 | 6,71E-09 | 1,22E-06 |
| 7259  | ENSG00000134323 | MYCN     | 56,35248 | 2,412101 | 0,500016 | 4,824051 | 1,41E-06 | 0,000129 |
| 2662  | ENSG00000089199 | CHGB     | 21,33051 | 2,351663 | 0,728772 | 3,226883 | 0,001251 | 0,027897 |
| 4777  | ENSG00000060140 | STYK1    | 29,59752 | 2,344949 | 0,674457 | 3,476794 | 0,000507 | 0,014464 |
| 9105  | ENSG00000115361 | ACADL    | 27,00541 | 2,332166 | 0,665138 | 3,50629  | 0,000454 | 0,013205 |
| 13778 | ENSG00000215397 | SCRT2    | 55,94425 | 2,33104  | 0,503951 | 4,625532 | 3,74E-06 | 0,000288 |
| 6615  | ENSG00000096060 | FKBP5    | 1543,623 | 2,321169 | 0,233855 | 9,925656 | 3,22E-23 | 6,16E-20 |
| 13115 | ENSG00000171345 | KRT19    | 57,87175 | 2,305372 | 0,525825 | 4,384295 | 1,16E-05 | 0,000725 |
| 9707  | ENSG00000185630 | PBX1     | 110,4971 | 2,292125 | 0,383729 | 5,973284 | 2,33E-09 | 4,72E-07 |
| 7494  | ENSG00000114446 | IFT57    | 58,11079 | 2,289305 | 0,514118 | 4,452879 | 8,47E-06 | 0,000571 |
| 895   | ENSG00000126016 | AMOT     | 91,2566  | 2,27989  | 0,38584  | 5,908898 | 3,44E-09 | 6,69E-07 |
| 3851  | ENSG00000171517 | LPAR3    | 281,8455 | 2,27236  | 0,261232 | 8,698634 | 3,36E-18 | 2,05E-15 |
| 2441  | ENSG00000057704 | TMCC3    | 57,22906 | 2,21498  | 0,457571 | 4,840739 | 1,29E-06 | 0,00012  |
| 3297  | ENSG00000165443 | PHYHIPL  | 43,92661 | 2,205713 | 0,632396 | 3,487869 | 0,000487 | 0,013997 |
| 7940  | ENSG00000106789 | CORO2A   | 109,6789 | 2,186537 | 0,394164 | 5,547278 | 2,90E-08 | 4,57E-06 |

|       |                 |            |          |          |          |          |          |          |
|-------|-----------------|------------|----------|----------|----------|----------|----------|----------|
| 14245 | ENSG00000112297 | CRYBG1     | 80,56753 | 2,168064 | 0,480234 | 4,514604 | 6,34E-06 | 0,000445 |
| 11363 | ENSG00000165379 | LRFN5      | 38,45419 | 2,160284 | 0,561254 | 3,849034 | 0,000119 | 0,004673 |
| 5824  | ENSG00000196549 | MME        | 167,2089 | 2,148549 | 0,370375 | 5,801004 | 6,59E-09 | 1,21E-06 |
| 13877 | ENSG00000144868 | TMEM108    | 22,69783 | 2,138419 | 0,677315 | 3,157198 | 0,001593 | 0,032984 |
| 901   | ENSG00000102038 | SMARCA1    | 62,57021 | 2,120874 | 0,509516 | 4,162527 | 3,15E-05 | 0,001568 |
| 12592 | ENSG00000178202 | KDELC2     | 27,46522 | 2,116054 | 0,703686 | 3,007098 | 0,002638 | 0,047686 |
| 5638  | ENSG00000182636 | NDN        | 47,01186 | 2,10541  | 0,625804 | 3,364329 | 0,000767 | 0,019649 |
| 10409 | ENSG00000009694 | TENM1      | 53,27985 | 2,098601 | 0,494712 | 4,242063 | 2,21E-05 | 0,001211 |
| 874   | ENSG00000168143 | FAM83B     | 35,91412 | 2,095326 | 0,683757 | 3,064433 | 0,002181 | 0,041863 |
| 5209  | ENSG00000180592 | SKIDA1     | 31,9823  | 2,094895 | 0,676082 | 3,09858  | 0,001945 | 0,038197 |
| 77    | ENSG00000164647 | STEAP1     | 695,1946 | 2,09459  | 0,238996 | 8,764122 | 1,88E-18 | 1,20E-15 |
| 7184  | ENSG00000186001 | LRCH3      | 41,0201  | 2,087913 | 0,592775 | 3,522266 | 0,000428 | 0,012604 |
| 13162 | ENSG00000278139 | AL358075.4 | 133,1237 | 2,081157 | 0,498376 | 4,175875 | 2,97E-05 | 0,001495 |
| 8189  | ENSG00000184226 | PCDH9      | 42,12706 | 2,072386 | 0,533803 | 3,882302 | 0,000103 | 0,004175 |
| 605   | ENSG00000197747 | S100A10    | 358,7318 | 2,04527  | 0,244392 | 8,368824 | 5,82E-17 | 2,89E-14 |
| 7551  | ENSG00000197991 | AL592490.1 | 311,9625 | 2,040969 | 0,368252 | 5,54232  | 2,98E-08 | 4,62E-06 |
| 6797  | ENSG00000137198 | GMPR       | 32,36571 | 2,027931 | 0,618502 | 3,278778 | 0,001043 | 0,024634 |
| 5708  | ENSG00000126803 | HSPA2      | 38,70143 | 2,000582 | 0,570254 | 3,508231 | 0,000451 | 0,013166 |
| 3818  | ENSG00000173272 | MZT2A      | 33,03194 | 1,999168 | 0,605046 | 3,304157 | 0,000953 | 0,023037 |
| 12445 | ENSG00000125398 | SOX9       | 97,23192 | 1,998591 | 0,470884 | 4,244335 | 2,19E-05 | 0,001211 |
| 5039  | ENSG00000164850 | GPRI1      | 59,35285 | 1,98335  | 0,46735  | 4,243819 | 2,20E-05 | 0,001211 |
| 11010 | ENSG00000269405 | NXF2       | 87,03834 | 1,975879 | 0,5347   | 3,695307 | 0,00022  | 0,007821 |
| 13164 | ENSG00000187372 | PCDHB13    | 92,05407 | 1,974875 | 0,451187 | 4,377068 | 1,20E-05 | 0,000743 |
| 7548  | ENSG00000280165 | PCDH20     | 321,0616 | 1,971804 | 0,376778 | 5,233328 | 1,66E-07 | 2,14E-05 |
| 13822 | ENSG00000187398 | LUZP2      | 48,75065 | 1,966595 | 0,495577 | 3,968294 | 7,24E-05 | 0,00318  |
| 1574  | ENSG00000103044 | HAS3       | 37,94869 | 1,954282 | 0,531697 | 3,675558 | 0,000237 | 0,008302 |
| 6426  | ENSG00000131171 | SH3BGRL    | 81,32243 | 1,948677 | 0,389816 | 4,998965 | 5,76E-07 | 5,94E-05 |
| 4872  | ENSG00000102290 | PCDH11X    | 32,43172 | 1,94164  | 0,61852  | 3,139172 | 0,001694 | 0,034628 |
| 8881  | ENSG00000148488 | ST8SIA6    | 55,42436 | 1,935669 | 0,534967 | 3,618299 | 0,000297 | 0,009886 |
| 3534  | ENSG00000117525 | F3         | 104,3897 | 1,930882 | 0,384002 | 5,028307 | 4,95E-07 | 5,14E-05 |
| 7092  | ENSG00000116667 | C1orf21    | 60,16224 | 1,927739 | 0,548711 | 3,513212 | 0,000443 | 0,01295  |
| 5214  | ENSG00000182111 | ZNF716     | 141,4972 | 1,912898 | 0,373456 | 5,122152 | 3,02E-07 | 3,46E-05 |
| 4257  | ENSG00000156140 | ADAMTS3    | 51,73776 | 1,912844 | 0,458488 | 4,172073 | 3,02E-05 | 0,001509 |
| 13972 | ENSG00000254979 | AP000781.2 | 29,62233 | 1,892452 | 0,596615 | 3,171979 | 0,001514 | 0,031772 |
| 8098  | ENSG00000026025 | VIM        | 30,4054  | 1,875383 | 0,608454 | 3,082209 | 0,002055 | 0,040068 |
| 3253  | ENSG00000124942 | AHNAK      | 77,90763 | 1,865124 | 0,415335 | 4,490646 | 7,10E-06 | 0,00049  |
| 8134  | ENSG00000169213 | RAB3B      | 226,8712 | 1,863903 | 0,389755 | 4,782244 | 1,73E-06 | 0,00015  |
| 3300  | ENSG00000188112 | C6orf132   | 137,0834 | 1,854969 | 0,368464 | 5,034331 | 4,80E-07 | 5,06E-05 |
| 2229  | ENSG00000090402 | SI         | 31,31998 | 1,853001 | 0,610867 | 3,033394 | 0,002418 | 0,045184 |
| 8679  | ENSG00000138115 | CYP2C8     | 75,78295 | 1,821903 | 0,412842 | 4,413072 | 1,02E-05 | 0,000666 |
| 5241  | ENSG00000144445 | KANSL1L    | 79,08733 | 1,816722 | 0,387585 | 4,687281 | 2,77E-06 | 0,000228 |
| 6041  | ENSG00000135549 | PKIB       | 75,58236 | 1,814537 | 0,433027 | 4,190355 | 2,79E-05 | 0,001442 |
| 2960  | ENSG00000185133 | INPP5J     | 105,4816 | 1,796349 | 0,40922  | 4,389694 | 1,14E-05 | 0,000711 |
| 3583  | ENSG00000185436 | IFNLR1     | 79,90221 | 1,778714 | 0,38874  | 4,575584 | 4,75E-06 | 0,000355 |
| 7099  | ENSG00000113761 | ZNF346     | 44,50355 | 1,77403  | 0,518201 | 3,423439 | 0,000618 | 0,016701 |

|       |                 |            |          |          |          |          |          |          |
|-------|-----------------|------------|----------|----------|----------|----------|----------|----------|
| 12243 | ENSG00000185347 | TEDC1      | 43,95929 | 1,736886 | 0,551106 | 3,151634 | 0,001624 | 0,033412 |
| 34    | ENSG00000157214 | STEAP2     | 801,6213 | 1,736497 | 0,235866 | 7,362206 | 1,81E-13 | 6,55E-11 |
| 3642  | ENSG00000134215 | VAV3       | 50,73842 | 1,725482 | 0,531061 | 3,249122 | 0,001158 | 0,02633  |
| 12553 | ENSG00000178235 | SLITRK1    | 66,67774 | 1,713736 | 0,419035 | 4,089723 | 4,32E-05 | 0,002066 |
| 5091  | ENSG00000152952 | PLOD2      | 113,3525 | 1,70455  | 0,371694 | 4,585895 | 4,52E-06 | 0,000341 |
| 9610  | ENSG00000276043 | UHRF1      | 227,5896 | 1,696552 | 0,300691 | 5,642169 | 1,68E-08 | 2,85E-06 |
| 951   | ENSG00000184900 | SUMO3      | 88,12632 | 1,69451  | 0,398944 | 4,247491 | 2,16E-05 | 0,001211 |
| 13873 | ENSG00000085552 | IGSF9      | 227,5842 | 1,687886 | 0,353672 | 4,772465 | 1,82E-06 | 0,000156 |
| 9041  | ENSG00000113361 | CDH6       | 187,1855 | 1,681088 | 0,289071 | 5,815487 | 6,05E-09 | 1,12E-06 |
| 4675  | ENSG00000137801 | THBS1      | 104,9556 | 1,668463 | 0,379374 | 4,397941 | 1,09E-05 | 0,00069  |
| 13154 | ENSG00000117461 | PIK3R3     | 91,20126 | 1,652806 | 0,445141 | 3,712994 | 0,000205 | 0,007416 |
| 14689 | ENSG00000132017 | DCAF15     | 93,53481 | 1,637205 | 0,377488 | 4,3371   | 1,44E-05 | 0,000867 |
| 1960  | ENSG00000273167 | AL359736.1 | 369,0738 | 1,636099 | 0,243957 | 6,706514 | 1,99E-11 | 5,14E-09 |
| 454   | ENSG00000196227 | FAM217B    | 42,902   | 1,633704 | 0,502636 | 3,250269 | 0,001153 | 0,02633  |
| 6970  | ENSG00000160862 | AZGP1      | 324,4284 | 1,620678 | 0,260372 | 6,22447  | 4,83E-10 | 1,12E-07 |
| 6196  | ENSG00000005249 | PRKAR2B    | 160,3904 | 1,615    | 0,319276 | 5,058317 | 4,23E-07 | 4,53E-05 |
| 1922  | ENSG00000182957 | SPATA13    | 87,06863 | 1,612026 | 0,382145 | 4,218363 | 2,46E-05 | 0,001319 |
| 14518 | ENSG00000138162 | TACC2      | 79,70683 | 1,604841 | 0,38376  | 4,181883 | 2,89E-05 | 0,001478 |
| 908   | ENSG00000122952 | ZWINT      | 309,4779 | 1,562153 | 0,297544 | 5,25016  | 1,52E-07 | 2,02E-05 |
| 12728 | ENSG00000185432 | METTL7A    | 885,9759 | 1,560603 | 0,217092 | 7,188669 | 6,54E-13 | 2,14E-10 |
| 3889  | ENSG00000179348 | GATA2      | 149,6172 | 1,560437 | 0,312858 | 4,987685 | 6,11E-07 | 6,25E-05 |
| 4839  | ENSG00000115657 | ABCB6      | 66,22907 | 1,546524 | 0,427819 | 3,614901 | 0,0003   | 0,009988 |
| 7800  | ENSG00000147257 | GPC3       | 91,38127 | 1,545509 | 0,47452  | 3,256997 | 0,001126 | 0,026008 |
| 8219  | ENSG00000131016 | AKAP12     | 108,5317 | 1,524152 | 0,397608 | 3,8333   | 0,000126 | 0,004967 |
| 12847 | ENSG00000079112 | CDH17      | 129,0968 | 1,522128 | 0,326907 | 4,656144 | 3,22E-06 | 0,000257 |
| 2363  | ENSG00000068078 | FGFR3      | 50,15642 | 1,521516 | 0,474985 | 3,203294 | 0,001359 | 0,029645 |
| 4803  | ENSG00000115884 | SDC1       | 107,2219 | 1,511821 | 0,379633 | 3,982325 | 6,82E-05 | 0,003017 |
| 2238  | ENSG00000013810 | TACC3      | 107,6607 | 1,503408 | 0,359053 | 4,187148 | 2,82E-05 | 0,00145  |
| 2984  | ENSG00000104889 | RNASEH2A   | 138,2459 | 1,502964 | 0,409592 | 3,669418 | 0,000243 | 0,008416 |
| 7575  | ENSG00000006210 | CX3CL1     | 204,8481 | 1,494292 | 0,352535 | 4,238701 | 2,25E-05 | 0,001224 |
| 4248  | ENSG00000078018 | MAP2       | 54,67989 | 1,493982 | 0,478518 | 3,122101 | 0,001796 | 0,036339 |
| 1166  | ENSG00000171848 | RRM2       | 443,1898 | 1,489703 | 0,279702 | 5,326035 | 1,00E-07 | 1,42E-05 |
| 5907  | ENSG00000163040 | CCDC74A    | 83,62464 | 1,488964 | 0,450599 | 3,304409 | 0,000952 | 0,023037 |
| 11876 | ENSG00000075702 | WDR62      | 47,17051 | 1,486331 | 0,493568 | 3,011401 | 0,0026   | 0,04727  |
| 8625  | ENSG00000113368 | LMNB1      | 480,9657 | 1,485825 | 0,319909 | 4,644524 | 3,41E-06 | 0,000267 |
| 2983  | ENSG00000284491 | AC020934.3 | 81,78638 | 1,45254  | 0,44875  | 3,236857 | 0,001209 | 0,027166 |
| 12785 | ENSG00000165300 | SLITRK5    | 342,5492 | 1,452397 | 0,248887 | 5,835556 | 5,36E-09 | 1,03E-06 |
| 4468  | ENSG00000138668 | HNRNPD     | 264,5106 | 1,450392 | 0,414409 | 3,499902 | 0,000465 | 0,013467 |
| 306   | ENSG00000135333 | EPHA7      | 432,7317 | 1,442021 | 0,235722 | 6,117474 | 9,51E-10 | 2,12E-07 |
| 469   | ENSG00000213949 | ITGA1      | 120,8022 | 1,426303 | 0,323357 | 4,410918 | 1,03E-05 | 0,000669 |
| 3582  | ENSG00000165891 | E2F7       | 109,94   | 1,426209 | 0,394907 | 3,611504 | 0,000304 | 0,010027 |
| 1165  | ENSG00000284681 | AC007240.1 | 460,9462 | 1,421311 | 0,27851  | 5,103257 | 3,34E-07 | 3,79E-05 |
| 5171  | ENSG00000111670 | GNPTAB     | 69,38726 | 1,420827 | 0,431976 | 3,289131 | 0,001005 | 0,023999 |
| 8691  | ENSG00000180998 | GPR137C    | 148,961  | 1,418911 | 0,320183 | 4,431569 | 9,35E-06 | 0,000624 |
| 14253 | ENSG00000080839 | RBL1       | 70,54804 | 1,407385 | 0,419065 | 3,358396 | 0,000784 | 0,019854 |

|       |                 |               |          |          |          |          |          |          |
|-------|-----------------|---------------|----------|----------|----------|----------|----------|----------|
| 4914  | ENSG00000177842 | ZNF620        | 81,5848  | 1,392834 | 0,417032 | 3,339874 | 0,000838 | 0,02091  |
| 14144 | ENSG00000074855 | ANO8          | 98,44634 | 1,385231 | 0,409401 | 3,383558 | 0,000716 | 0,01865  |
| 10301 | ENSG00000138604 | GLCE          | 64,2211  | 1,377608 | 0,431258 | 3,194392 | 0,001401 | 0,030084 |
| 4173  | ENSG00000175895 | PLEKHF2       | 178,4545 | 1,376631 | 0,311132 | 4,424587 | 9,66E-06 | 0,000635 |
| 1834  | ENSG00000153179 | RASSF3        | 943,3784 | 1,375629 | 0,200234 | 6,870098 | 6,42E-12 | 1,77E-09 |
| 2037  | ENSG00000065978 | YBX1          | 1413,435 | 1,370661 | 0,21724  | 6,309419 | 2,80E-10 | 6,70E-08 |
| 2663  | ENSG00000138771 | SHROOM3       | 69,98541 | 1,365347 | 0,397801 | 3,432241 | 0,000599 | 0,016434 |
| 4551  | ENSG00000083720 | OXCT1         | 147,4006 | 1,363817 | 0,401776 | 3,394475 | 0,000688 | 0,018143 |
| 12124 | ENSG00000120802 | TMPO          | 392,0502 | 1,35994  | 0,319343 | 4,258561 | 2,06E-05 | 0,001168 |
| 8388  | ENSG00000112146 | FBXO9         | 98,49281 | 1,355672 | 0,392183 | 3,456728 | 0,000547 | 0,015296 |
| 5597  | ENSG00000163545 | NUAK2         | 268,8769 | 1,335024 | 0,278715 | 4,789918 | 1,67E-06 | 0,000145 |
| 10584 | ENSG00000165816 | VWA2          | 86,503   | 1,321763 | 0,417689 | 3,164468 | 0,001554 | 0,032388 |
| 4453  | ENSG00000100836 | PABPN1        | 300,108  | 1,317238 | 0,412285 | 3,194972 | 0,001398 | 0,030072 |
| 10568 | ENSG00000154654 | NCAM2         | 106,5991 | 1,312902 | 0,388924 | 3,375727 | 0,000736 | 0,01908  |
| 2818  | ENSG00000122778 | KIAA1549      | 855,7146 | 1,310535 | 0,233042 | 5,623595 | 1,87E-08 | 3,09E-06 |
| 4804  | ENSG00000070087 | PFN2          | 170,6349 | 1,310513 | 0,362953 | 3,610701 | 0,000305 | 0,010027 |
| 6878  | ENSG00000117054 | ACADM         | 173,188  | 1,30086  | 0,355782 | 3,65634  | 0,000256 | 0,008721 |
| 6842  | ENSG00000182010 | RTKN2         | 98,19748 | 1,299525 | 0,409111 | 3,176462 | 0,001491 | 0,031503 |
| 1525  | ENSG00000171388 | APLN          | 6218,452 | 1,297157 | 0,186635 | 6,95023  | 3,65E-12 | 1,09E-09 |
| 1430  | ENSG00000140534 | TICRR         | 285,0852 | 1,290292 | 0,349263 | 3,694323 | 0,00022  | 0,007821 |
| 5680  | ENSG00000100714 | MTHFD1        | 150,3123 | 1,288514 | 0,374406 | 3,441485 | 0,000579 | 0,016014 |
| 6376  | ENSG00000043143 | JADE2         | 144,7854 | 1,280436 | 0,318164 | 4,024457 | 5,71E-05 | 0,002593 |
| 6720  | ENSG00000147526 | TACC1         | 103,8406 | 1,268317 | 0,368048 | 3,446068 | 0,000569 | 0,01581  |
| 6080  | ENSG00000156802 | ATAD2         | 305,3149 | 1,268064 | 0,320308 | 3,958885 | 7,53E-05 | 0,003265 |
| 12779 | ENSG00000072501 | SMC1A         | 416,5421 | 1,258787 | 0,323968 | 3,88553  | 0,000102 | 0,004133 |
| 5662  | ENSG00000169439 | SDC2          | 230,8293 | 1,258564 | 0,287121 | 4,383387 | 1,17E-05 | 0,000725 |
| 13819 | ENSG00000116962 | NID1          | 238,848  | 1,251108 | 0,317481 | 3,940729 | 8,12E-05 | 0,003412 |
| 2979  | ENSG00000139880 | CDH24         | 158,45   | 1,235235 | 0,318447 | 3,878938 | 0,000105 | 0,004208 |
| 1420  | ENSG00000122126 | OCRL          | 688,7515 | 1,234424 | 0,239554 | 5,153017 | 2,56E-07 | 3,04E-05 |
| 6208  | ENSG00000099624 | ATP5D         | 219,3621 | 1,234172 | 0,373766 | 3,301987 | 0,00096  | 0,023132 |
| 611   | ENSG00000163191 | S100A11       | 1916,462 | 1,233228 | 0,264952 | 4,654534 | 3,25E-06 | 0,000257 |
| 3199  | ENSG00000137203 | TFAP2A        | 151,8862 | 1,230261 | 0,301493 | 4,080562 | 4,49E-05 | 0,002126 |
| 5298  | ENSG00000115457 | IGFBP2        | 296,5188 | 1,229218 | 0,273358 | 4,496725 | 6,90E-06 | 0,000482 |
| 4469  | ENSG00000258643 | BCL2L2-PABPN1 | 415,1561 | 1,229195 | 0,306378 | 4,012018 | 6,02E-05 | 0,002716 |
| 7656  | ENSG00000158813 | EDA           | 125,1817 | 1,22751  | 0,332939 | 3,686895 | 0,000227 | 0,008003 |
| 13563 | ENSG00000100697 | DICER1        | 144,3216 | 1,217801 | 0,324833 | 3,749006 | 0,000178 | 0,006584 |
| 2419  | ENSG00000163703 | CRELD1        | 103,0775 | 1,215527 | 0,359229 | 3,383708 | 0,000715 | 0,01865  |
| 11397 | ENSG00000148835 | TAF5          | 162,4547 | 1,208551 | 0,38383  | 3,148662 | 0,00164  | 0,033702 |
| 11398 | ENSG00000143158 | MPC2          | 622,3595 | 1,203318 | 0,269499 | 4,465023 | 8,01E-06 | 0,000547 |
| 1935  | ENSG00000158270 | COLEC12       | 624,9882 | 1,19851  | 0,244204 | 4,907829 | 9,21E-07 | 8,94E-05 |
| 12510 | ENSG00000136802 | LRRC8A        | 1521,748 | 1,187921 | 0,194636 | 6,10329  | 1,04E-09 | 2,25E-07 |
| 13921 | ENSG00000167536 | DHRS13        | 98,12042 | 1,187406 | 0,348224 | 3,40989  | 0,00065  | 0,017275 |
| 2171  | ENSG00000123080 | CDKN2C        | 138,1864 | 1,168434 | 0,305909 | 3,819549 | 0,000134 | 0,005222 |
| 10336 | ENSG00000147027 | TMEM47        | 178,9825 | 1,166291 | 0,295557 | 3,946082 | 7,94E-05 | 0,003387 |
| 156   | ENSG00000007968 | E2F2          | 286,2784 | 1,164707 | 0,252033 | 4,621243 | 3,81E-06 | 0,000292 |

|       |                 |            |          |          |          |          |          |          |
|-------|-----------------|------------|----------|----------|----------|----------|----------|----------|
| 14259 | ENSG00000147862 | NFIB       | 134,3554 | 1,161757 | 0,348054 | 3,337864 | 0,000844 | 0,021023 |
| 11612 | ENSG00000094804 | CDC6       | 127,1165 | 1,149125 | 0,322046 | 3,568205 | 0,000359 | 0,011154 |
| 958   | ENSG00000092470 | WDR76      | 137,3056 | 1,146458 | 0,349588 | 3,279449 | 0,00104  | 0,024631 |
| 12143 | ENSG00000109906 | ZBTB16     | 147,0148 | 1,143825 | 0,374166 | 3,056995 | 0,002236 | 0,042545 |
| 3827  | ENSG00000169760 | NLGN1      | 115,1643 | 1,1404   | 0,332511 | 3,429657 | 0,000604 | 0,016496 |
| 13546 | ENSG00000123643 | SLC36A1    | 135,6339 | 1,139451 | 0,322648 | 3,531565 | 0,000413 | 0,012326 |
| 6219  | ENSG00000101911 | PRPS2      | 101,7565 | 1,131129 | 0,374517 | 3,020236 | 0,002526 | 0,046481 |
| 14802 | ENSG00000105011 | ASF1B      | 137,3843 | 1,125447 | 0,310639 | 3,623005 | 0,000291 | 0,009753 |
| 13750 | ENSG00000160014 | CALM3      | 2158,457 | 1,119423 | 0,200483 | 5,58362  | 2,36E-08 | 3,76E-06 |
| 4466  | ENSG00000215271 | HOMEZ      | 107,8962 | 1,112267 | 0,362688 | 3,06673  | 0,002164 | 0,041717 |
| 8306  | ENSG00000118985 | ELL2       | 242,0922 | 1,106381 | 0,266548 | 4,150779 | 3,31E-05 | 0,001638 |
| 5118  | ENSG00000242265 | PEG10      | 6467,017 | 1,096477 | 0,196363 | 5,583942 | 2,35E-08 | 3,76E-06 |
| 12392 | ENSG00000125968 | ID1        | 131,3099 | 1,087911 | 0,356508 | 3,051579 | 0,002276 | 0,042893 |
| 2426  | ENSG00000175305 | CCNE2      | 312,042  | 1,085785 | 0,287617 | 3,775103 | 0,00016  | 0,006036 |
| 4552  | ENSG00000081803 | CADPS2     | 100,9153 | 1,085544 | 0,358788 | 3,025588 | 0,002482 | 0,046045 |
| 279   | ENSG00000115216 | NRBP1      | 437,6449 | 1,082578 | 0,222694 | 4,86129  | 1,17E-06 | 0,00011  |
| 3885  | ENSG00000164687 | FABP5      | 253,3925 | 1,074559 | 0,305087 | 3,522143 | 0,000428 | 0,012604 |
| 10911 | ENSG00000197157 | SND1       | 145,8778 | 1,070423 | 0,303339 | 3,5288   | 0,000417 | 0,0124   |
| 9945  | ENSG00000064651 | SLC12A2    | 113,9501 | 1,061442 | 0,331517 | 3,201772 | 0,001366 | 0,029649 |
| 4058  | ENSG00000084444 | FAM234B    | 142,7842 | 1,061177 | 0,315468 | 3,363814 | 0,000769 | 0,019649 |
| 2089  | ENSG00000144136 | SLC20A1    | 187,4529 | 1,05948  | 0,287663 | 3,683057 | 0,00023  | 0,008103 |
| 7645  | ENSG00000075624 | ACTB       | 187,9948 | 1,057723 | 0,281435 | 3,758326 | 0,000171 | 0,006378 |
| 4408  | ENSG00000162636 | FAM102B    | 232,6775 | 1,056142 | 0,314189 | 3,361483 | 0,000775 | 0,019709 |
| 932   | ENSG00000177076 | ACER2      | 203,9836 | 1,048921 | 0,330712 | 3,171709 | 0,001515 | 0,031772 |
| 1452  | ENSG00000073111 | MCM2       | 376,1144 | 1,047259 | 0,23817  | 4,397116 | 1,10E-05 | 0,00069  |
| 12492 | ENSG00000258881 | AC007040.2 | 164,0911 | 1,045141 | 0,339406 | 3,079321 | 0,002075 | 0,0404   |
| 7326  | ENSG00000074695 | LMAN1      | 147,9037 | 1,040586 | 0,334496 | 3,110907 | 0,001865 | 0,037462 |
| 6170  | ENSG00000128595 | CALU       | 810,7848 | 1,029871 | 0,287276 | 3,584952 | 0,000337 | 0,010703 |
| 4680  | ENSG00000111602 | TIMELESS   | 263,2414 | 1,020508 | 0,249189 | 4,095316 | 4,22E-05 | 0,002032 |
| 14183 | ENSG00000198668 | CALM1      | 330,7393 | 1,01818  | 0,294106 | 3,461949 | 0,000536 | 0,015157 |
| 6586  | ENSG00000086289 | EPDR1      | 160,16   | 1,017547 | 0,327808 | 3,104092 | 0,001909 | 0,037882 |
| 6401  | ENSG00000135097 | MSI1       | 151,4378 | 1,01467  | 0,316919 | 3,201676 | 0,001366 | 0,029649 |
| 3979  | ENSG00000112118 | MCM3       | 154,7774 | 1,012365 | 0,318904 | 3,174517 | 0,001501 | 0,031615 |
| 13203 | ENSG00000188486 | H2AFX      | 515,6    | 1,011817 | 0,233677 | 4,329992 | 1,49E-05 | 0,000892 |
| 4792  | ENSG00000111666 | CHPT1      | 404,6121 | 1,011612 | 0,236058 | 4,28544  | 1,82E-05 | 0,001067 |
| 7672  | ENSG00000141682 | PMAIP1     | 202,5773 | 1,00502  | 0,28032  | 3,585256 | 0,000337 | 0,010703 |
| 3383  | ENSG00000173905 | GOLIM4     | 303,1911 | 1,003382 | 0,334847 | 2,996536 | 0,002731 | 0,049208 |
| 11352 | ENSG00000085733 | CTTN       | 171,2454 | 0,997456 | 0,31156  | 3,201489 | 0,001367 | 0,029649 |
| 2447  | ENSG00000005469 | CROT       | 505,0198 | 0,995153 | 0,279525 | 3,56016  | 0,000371 | 0,011368 |
| 9459  | ENSG00000165244 | ZNF367     | 802,1191 | 0,994113 | 0,257874 | 3,855035 | 0,000116 | 0,004573 |
| 6446  | ENSG00000150347 | ARID5B     | 421,2709 | 0,99407  | 0,219619 | 4,526349 | 6,00E-06 | 0,000428 |
| 8664  | ENSG00000197451 | HNRNPAB    | 725,5382 | 0,992475 | 0,274678 | 3,613227 | 0,000302 | 0,010003 |
| 7161  | ENSG00000137693 | YAP1       | 127,4521 | 0,992204 | 0,309211 | 3,208826 | 0,001333 | 0,029128 |
| 9957  | ENSG00000127838 | PNKD       | 132,717  | 0,990726 | 0,327581 | 3,024368 | 0,002492 | 0,046167 |
| 2120  | ENSG00000148671 | ADIRF      | 885,3468 | 0,990093 | 0,271822 | 3,642427 | 0,00027  | 0,009137 |

|       |                 |            |          |          |          |          |          |          |
|-------|-----------------|------------|----------|----------|----------|----------|----------|----------|
| 6681  | ENSG00000142634 | EFHD2      | 121,8065 | 0,985986 | 0,322934 | 3,053209 | 0,002264 | 0,042889 |
| 2015  | ENSG00000152102 | FAM168B    | 320,6111 | 0,979174 | 0,277393 | 3,52992  | 0,000416 | 0,012375 |
| 13285 | ENSG00000104852 | SNRNP70    | 245,9489 | 0,976654 | 0,306794 | 3,183419 | 0,001455 | 0,031049 |
| 745   | ENSG00000162613 | FUBP1      | 378,0366 | 0,97184  | 0,297638 | 3,265178 | 0,001094 | 0,025488 |
| 4327  | ENSG00000122756 | CNTFR      | 168,7837 | 0,965257 | 0,298589 | 3,232723 | 0,001226 | 0,027424 |
| 113   | ENSG00000175793 | SFN        | 431,2046 | 0,957569 | 0,233162 | 4,106881 | 4,01E-05 | 0,001951 |
| 14364 | ENSG00000182704 | TSKU       | 367,2414 | 0,952461 | 0,250898 | 3,796205 | 0,000147 | 0,00564  |
| 11146 | ENSG00000198785 | GRIN3A     | 535,1053 | 0,944266 | 0,217397 | 4,343521 | 1,40E-05 | 0,00085  |
| 14515 | ENSG00000106462 | EZH2       | 405,7978 | 0,940513 | 0,288743 | 3,257266 | 0,001125 | 0,026008 |
| 12316 | ENSG00000163932 | PRKCD      | 361,5548 | 0,935171 | 0,234793 | 3,982969 | 6,81E-05 | 0,003017 |
| 14369 | ENSG00000172292 | CERS6      | 1483,452 | 0,930965 | 0,198467 | 4,690785 | 2,72E-06 | 0,000225 |
| 1791  | ENSG00000163251 | FZD5       | 638,8036 | 0,927422 | 0,232773 | 3,98424  | 6,77E-05 | 0,003013 |
| 8635  | ENSG00000167749 | KLK4       | 1801,87  | 0,910002 | 0,206885 | 4,398596 | 1,09E-05 | 0,00069  |
| 2364  | ENSG00000176890 | TYMS       | 352,8647 | 0,908272 | 0,272621 | 3,33163  | 0,000863 | 0,02142  |
| 8346  | ENSG00000008394 | MGST1      | 260,7645 | 0,905141 | 0,253279 | 3,573689 | 0,000352 | 0,011018 |
| 1513  | ENSG00000138814 | PPP3CA     | 800,2817 | 0,903004 | 0,221741 | 4,072343 | 4,65E-05 | 0,002188 |
| 3360  | ENSG00000101191 | DIDO1      | 298,0416 | 0,896437 | 0,235286 | 3,809989 | 0,000139 | 0,005397 |
| 1852  | ENSG00000124766 | SOX4       | 1298,646 | 0,888352 | 0,203955 | 4,355631 | 1,33E-05 | 0,000812 |
| 13324 | ENSG00000137727 | ARHGAP20   | 524,8415 | 0,886643 | 0,261169 | 3,394895 | 0,000687 | 0,018143 |
| 3803  | ENSG00000094916 | CBX5       | 568,4889 | 0,882776 | 0,271899 | 3,246704 | 0,001167 | 0,02651  |
| 342   | ENSG00000178252 | WDR6       | 251,9564 | 0,882773 | 0,266314 | 3,314778 | 0,000917 | 0,022504 |
| 10286 | ENSG00000170515 | PA2G4      | 422,5541 | 0,8817   | 0,263405 | 3,347317 | 0,000816 | 0,02051  |
| 2557  | ENSG00000166483 | WEE1       | 417,0986 | 0,872745 | 0,282461 | 3,089786 | 0,002003 | 0,039289 |
| 4659  | ENSG00000111885 | MAN1A1     | 435,4372 | 0,872305 | 0,230972 | 3,776673 | 0,000159 | 0,006015 |
| 6571  | ENSG00000064393 | HIPK2      | 675,1148 | 0,871212 | 0,254737 | 3,420045 | 0,000626 | 0,016776 |
| 14418 | ENSG00000143476 | DTL        | 235,0877 | 0,859921 | 0,267151 | 3,218853 | 0,001287 | 0,0285   |
| 2513  | ENSG00000157240 | FZD1       | 333,3196 | 0,854602 | 0,235742 | 3,62516  | 0,000289 | 0,009696 |
| 774   | ENSG00000116741 | RGS2       | 2781,108 | 0,838084 | 0,249678 | 3,356659 | 0,000789 | 0,019911 |
| 4288  | ENSG00000186575 | NF2        | 745,1033 | 0,834294 | 0,23267  | 3,585745 | 0,000336 | 0,010703 |
| 2636  | ENSG00000102034 | ELF4       | 276,8744 | 0,83191  | 0,267848 | 3,10591  | 0,001897 | 0,037705 |
| 11084 | ENSG00000170779 | CDCA4      | 238,2856 | 0,829568 | 0,2607   | 3,182076 | 0,001462 | 0,031144 |
| 4306  | ENSG00000067113 | PLPP1      | 878,8598 | 0,821424 | 0,197607 | 4,156852 | 3,23E-05 | 0,001601 |
| 9403  | ENSG00000096070 | BRPF3      | 655,1108 | 0,821179 | 0,196519 | 4,178631 | 2,93E-05 | 0,001494 |
| 11829 | ENSG00000213064 | SFT2D2     | 1228,24  | 0,820671 | 0,2108   | 3,893134 | 9,90E-05 | 0,00403  |
| 1958  | ENSG00000111206 | FOXM1      | 352,1832 | 0,819156 | 0,235932 | 3,471999 | 0,000517 | 0,014663 |
| 9104  | ENSG00000110917 | MLEC       | 753,052  | 0,816091 | 0,258757 | 3,153885 | 0,001611 | 0,033258 |
| 7056  | ENSG00000259529 | AL136295.5 | 333,978  | 0,813322 | 0,265666 | 3,061446 | 0,002203 | 0,042096 |
| 11468 | ENSG00000182795 | C1orf116   | 1220,232 | 0,813059 | 0,193495 | 4,201963 | 2,65E-05 | 0,001396 |
| 4745  | ENSG00000065308 | TRAM2      | 335,5319 | 0,78987  | 0,261704 | 3,018179 | 0,002543 | 0,046605 |
| 7505  | ENSG00000135506 | OS9        | 272,0807 | 0,780192 | 0,253486 | 3,077846 | 0,002085 | 0,040483 |
| 8282  | ENSG00000277443 | MARCKS     | 874,922  | 0,776268 | 0,189734 | 4,091355 | 4,29E-05 | 0,002059 |
| 14342 | ENSG00000167900 | TK1        | 323,2442 | 0,773503 | 0,250766 | 3,084561 | 0,002039 | 0,039811 |
| 1391  | ENSG00000187514 | PTMA       | 1809,725 | 0,761629 | 0,230786 | 3,300146 | 0,000966 | 0,023243 |
| 1560  | ENSG00000186767 | SPIN4      | 260,631  | 0,759656 | 0,252448 | 3,00916  | 0,00262  | 0,047493 |
| 5581  | ENSG00000096433 | ITPR3      | 1085,135 | 0,750087 | 0,21738  | 3,450575 | 0,000559 | 0,015613 |

|       |                 |            |          |          |          |          |          |          |
|-------|-----------------|------------|----------|----------|----------|----------|----------|----------|
| 7678  | ENSG00000198830 | HMGN2      | 1857,106 | 0,749382 | 0,229096 | 3,271043 | 0,001072 | 0,025096 |
| 2492  | ENSG00000085185 | BCORL1     | 428,4715 | 0,742835 | 0,232036 | 3,201379 | 0,001368 | 0,029649 |
| 10428 | ENSG00000145050 | MANF       | 967,4112 | 0,741705 | 0,234491 | 3,163046 | 0,001561 | 0,032429 |
| 83    | ENSG00000155660 | PDIA4      | 1565,905 | 0,729131 | 0,195442 | 3,730668 | 0,000191 | 0,00699  |
| 6643  | ENSG00000076248 | UNG        | 635,6312 | 0,724754 | 0,2123   | 3,413827 | 0,000641 | 0,017095 |
| 1645  | ENSG00000101412 | E2F1       | 404,0802 | 0,724018 | 0,226594 | 3,195221 | 0,001397 | 0,030072 |
| 3177  | ENSG00000124225 | PMEPA1     | 425,24   | 0,707775 | 0,216168 | 3,274193 | 0,00106  | 0,024905 |
| 9066  | ENSG00000114867 | EIF4G1     | 586,144  | 0,705625 | 0,210872 | 3,346223 | 0,000819 | 0,020552 |
| 12628 | ENSG00000132646 | PCNA       | 1116,931 | 0,704663 | 0,207728 | 3,392245 | 0,000693 | 0,018246 |
| 5817  | ENSG00000005421 | PON1       | 387,687  | 0,682285 | 0,223551 | 3,052028 | 0,002273 | 0,042889 |
| 6210  | ENSG00000169083 | AR         | 1290,523 | 0,677847 | 0,186084 | 3,642688 | 0,00027  | 0,009137 |
| 194   | ENSG00000117318 | ID3        | 360,1539 | 0,676127 | 0,224249 | 3,015072 | 0,002569 | 0,046829 |
| 13018 | ENSG00000188229 | TUBB4B     | 2043,605 | 0,664782 | 0,176256 | 3,77169  | 0,000162 | 0,006102 |
| 12673 | ENSG00000044574 | HSPA5      | 5298,088 | 0,645839 | 0,210929 | 3,061869 | 0,0022   | 0,042096 |
| 7371  | ENSG00000282034 | AC106886.5 | 2184,805 | 0,61539  | 0,173557 | 3,545745 | 0,000392 | 0,011893 |



**Supplementary Table S4.** Ago2-immunoprecipitation in 22Rv1-anti-miR-379 and 22Rv1-SC grown in normal medium followed by RNA-seq

|       | Gene_stable_ID  | Gene_name | baseMean | log2FoldChange | lfcSE    | stat     | pvalue   | padj     |
|-------|-----------------|-----------|----------|----------------|----------|----------|----------|----------|
| 6253  | ENSG00000003436 | TFPI      | 71,12244 | 9,680593       | 1,32445  | 7,309139 | 2,69E-13 | 1,45E-10 |
| 13694 | ENSG00000186197 | EDARADD   | 44,4802  | 8,999401       | 1,382953 | 6,507382 | 7,65E-11 | 3,03E-08 |
| 2219  | ENSG00000213973 | ZNF99     | 26,38746 | 8,232531       | 1,50202  | 5,480973 | 4,23E-08 | 9,85E-06 |
| 12860 | ENSG00000131771 | PPP1R1B   | 25,2931  | 8,186807       | 1,482282 | 5,523112 | 3,33E-08 | 7,91E-06 |
| 7891  | ENSG00000112818 | MEP1A     | 19,9467  | 7,846068       | 1,583715 | 4,954218 | 7,26E-07 | 0,000137 |
| 3090  | ENSG00000100979 | PLTP      | 122,4141 | 7,825687       | 0,934729 | 8,372144 | 5,66E-17 | 5,17E-14 |
| 519   | ENSG00000139209 | SLC38A4   | 427,1241 | 7,634227       | 0,467037 | 16,34607 | 4,64E-60 | 2,75E-56 |
| 12033 | ENSG00000139117 | CPNE8     | 16,87029 | 7,611409       | 1,704099 | 4,466529 | 7,95E-06 | 0,001061 |
| 9021  | ENSG00000102401 | ARMCX3    | 14,85838 | 7,412295       | 1,738358 | 4,263962 | 2,01E-05 | 0,002149 |
| 14127 | ENSG00000122176 | FMOD      | 13,682   | 7,302268       | 1,698825 | 4,298424 | 1,72E-05 | 0,001909 |
| 9208  | ENSG00000180938 | ZNF572    | 12,65886 | 7,167129       | 2,189423 | 3,273524 | 0,001062 | 0,039416 |
| 183   | ENSG00000139793 | MBNL2     | 53,15597 | 7,059404       | 1,139265 | 6,196455 | 5,77E-10 | 2,02E-07 |
| 1160  | ENSG00000152093 | CFC1B     | 11,48312 | 7,028019       | 1,817929 | 3,865947 | 0,000111 | 0,007964 |
| 8869  | ENSG00000172238 | ATOH1     | 10,70916 | 6,960442       | 1,923179 | 3,619238 | 0,000295 | 0,016169 |
| 1116  | ENSG00000185015 | CA13      | 31,32465 | 6,85938        | 1,390563 | 4,932807 | 8,11E-07 | 0,00015  |
| 1036  | ENSG00000184735 | DDX53     | 9,716827 | 6,803845       | 1,957479 | 3,475821 | 0,000509 | 0,024786 |
| 10235 | ENSG00000166866 | MYO1A     | 9,38624  | 6,764654       | 1,954699 | 3,460714 | 0,000539 | 0,026006 |
| 12670 | ENSG00000268089 | GABRQ     | 25,9821  | 6,652812       | 1,775719 | 3,746545 | 0,000179 | 0,011216 |
| 6880  | ENSG00000156959 | LHFPL4    | 8,590021 | 6,634459       | 1,950635 | 3,401179 | 0,000671 | 0,03018  |
| 3551  | ENSG00000164294 | GPX8      | 8,341686 | 6,589402       | 1,948808 | 3,381248 | 0,000722 | 0,031787 |
| 1189  | ENSG00000160321 | ZNF208    | 8,295912 | 6,56441        | 1,983702 | 3,309171 | 0,000936 | 0,03596  |
| 10104 | ENSG00000009694 | TENM1     | 25,53709 | 6,288428       | 1,410081 | 4,459621 | 8,21E-06 | 0,001071 |
| 6698  | ENSG00000102362 | SYTL4     | 12,13724 | 6,163527       | 1,706104 | 3,612632 | 0,000303 | 0,016435 |
| 7973  | ENSG00000132855 | ANGPTL3   | 10,6566  | 5,894454       | 1,772979 | 3,324604 | 0,000885 | 0,034932 |
| 12951 | ENSG00000189056 | RELN      | 36,55298 | 5,842904       | 1,032231 | 5,660463 | 1,51E-08 | 4,17E-06 |
| 13985 | ENSG00000260903 | XKR7      | 23,30833 | 5,652134       | 1,627357 | 3,473199 | 0,000514 | 0,024928 |
| 9411  | ENSG00000115616 | SLC9A2    | 129,3306 | 5,514814       | 0,575003 | 9,590938 | 8,73E-22 | 1,15E-18 |
| 8204  | ENSG00000112343 | TRIM38    | 34,56858 | 5,470617       | 1,185162 | 4,615925 | 3,91E-06 | 0,000581 |
| 2683  | ENSG00000146376 | ARHGAP18  | 21,9228  | 5,457673       | 1,29458  | 4,215787 | 2,49E-05 | 0,002548 |
| 12010 | ENSG00000143469 | SYT14     | 19,36261 | 4,740979       | 1,226894 | 3,864214 | 0,000111 | 0,007973 |
| 2167  | ENSG00000167034 | NKX3-1    | 1217,096 | 4,584093       | 0,24335  | 18,83742 | 3,73E-79 | 4,43E-75 |
| 8645  | ENSG00000148488 | ST8SIA6   | 69,10713 | 4,420963       | 0,793803 | 5,569349 | 2,56E-08 | 6,33E-06 |
| 7937  | ENSG00000040731 | CDH10     | 86,64191 | 4,291861       | 0,675955 | 6,349328 | 2,16E-10 | 7,78E-08 |
| 11969 | ENSG00000184838 | PRR16     | 44,25457 | 4,279668       | 0,944438 | 4,531445 | 5,86E-06 | 0,000818 |
| 5731  | ENSG00000152661 | GJA1      | 321,5867 | 3,993068       | 0,489323 | 8,160386 | 3,34E-16 | 2,48E-13 |
| 7262  | ENSG00000114446 | IFT57     | 45,29831 | 3,934909       | 0,859381 | 4,578772 | 4,68E-06 | 0,000677 |
| 77    | ENSG00000164647 | STEAP1    | 876,4938 | 3,800117       | 0,234774 | 16,18631 | 6,30E-59 | 2,49E-55 |
| 8862  | ENSG00000182263 | FIGN      | 23,69688 | 3,77177        | 1,039534 | 3,62833  | 0,000285 | 0,015756 |
| 7591  | ENSG00000158715 | SLC45A3   | 538,424  | 3,595593       | 0,294933 | 12,19124 | 3,46E-34 | 1,03E-30 |
| 3445  | ENSG00000117525 | F3        | 116,1181 | 3,578758       | 0,532461 | 6,721164 | 1,80E-11 | 8,23E-09 |
| 3342  | ENSG00000178573 | MAF       | 52,98179 | 3,56275        | 0,885461 | 4,023612 | 5,73E-05 | 0,004793 |
| 7792  | ENSG00000189057 | FAM111B   | 651,6085 | 3,561459       | 0,342483 | 10,39894 | 2,51E-25 | 4,25E-22 |
| 8244  | ENSG00000123095 | BHLHE41   | 100,3506 | 3,259625       | 0,769927 | 4,233678 | 2,30E-05 | 0,002395 |



|       |                 |            |          |          |          |          |          |          |
|-------|-----------------|------------|----------|----------|----------|----------|----------|----------|
| 5467  | ENSG00000182636 | NDN        | 56,0938  | 3,142512 | 0,882949 | 3,559109 | 0,000372 | 0,019452 |
| 8794  | ENSG00000113361 | CDH6       | 109,5206 | 2,852396 | 0,42912  | 6,647078 | 2,99E-11 | 1,31E-08 |
| 7319  | ENSG00000280165 | PCDH20     | 350,2842 | 2,771274 | 0,336458 | 8,236622 | 1,77E-16 | 1,40E-13 |
| 7322  | ENSG00000197991 | AL592490.1 | 341,485  | 2,751423 | 0,331623 | 8,296831 | 1,07E-16 | 9,07E-14 |
| 2385  | ENSG00000057704 | TMCC3      | 60,72493 | 2,532935 | 0,648902 | 3,903417 | 9,48E-05 | 0,006995 |
| 13852 | ENSG00000198648 | STK39      | 423,2639 | 2,509281 | 0,291328 | 8,613245 | 7,10E-18 | 7,03E-15 |
| 5099  | ENSG00000144445 | KANSL1L    | 56,3172  | 2,496133 | 0,579205 | 4,309583 | 1,64E-05 | 0,00185  |
| 4543  | ENSG00000137801 | THBS1      | 155,2596 | 2,278936 | 0,418464 | 5,445956 | 5,15E-08 | 1,18E-05 |
| 3755  | ENSG00000171517 | LPAR3      | 262,6596 | 2,270491 | 0,295181 | 7,691869 | 1,45E-14 | 9,06E-12 |
| 3730  | ENSG00000169760 | NLGN1      | 84,64656 | 2,259012 | 0,636221 | 3,550672 | 0,000384 | 0,019926 |
| 6409  | ENSG00000096060 | FKBP5      | 1008,888 | 2,154842 | 0,225308 | 9,563967 | 1,13E-21 | 1,22E-18 |
| 1672  | ENSG00000178171 | AMER3      | 85,53939 | 2,086426 | 0,630052 | 3,311515 | 0,000928 | 0,03596  |
| 12066 | ENSG00000125398 | SOX9       | 108,8941 | 2,085039 | 0,437785 | 4,762696 | 1,91E-06 | 0,000334 |
| 30    | ENSG00000157214 | STEAP2     | 545,9525 | 2,039998 | 0,319204 | 6,39089  | 1,65E-10 | 6,12E-08 |
| 594   | ENSG00000197747 | S100A10    | 342,6275 | 2,00626  | 0,432274 | 4,641172 | 3,46E-06 | 0,000527 |
| 12454 | ENSG00000079112 | CDH17      | 104,714  | 1,970989 | 0,468698 | 4,205244 | 2,61E-05 | 0,002645 |
| 3946  | ENSG00000084444 | FAM234B    | 133,6366 | 1,962411 | 0,419457 | 4,678455 | 2,89E-06 | 0,000452 |
| 6753  | ENSG00000160862 | AZGP1      | 248,8221 | 1,907007 | 0,31567  | 6,041138 | 1,53E-09 | 5,19E-07 |
| 5646  | ENSG00000196549 | MME        | 126,1632 | 1,887441 | 0,451089 | 4,184185 | 2,86E-05 | 0,002786 |
| 6512  | ENSG00000147526 | TACC1      | 109,7863 | 1,878457 | 0,426511 | 4,404237 | 1,06E-05 | 0,001313 |
| 5492  | ENSG00000169439 | SDC2       | 243,8328 | 1,747311 | 0,478202 | 3,653916 | 0,000258 | 0,01462  |
| 7898  | ENSG00000169213 | RAB3B      | 161,1794 | 1,740368 | 0,475098 | 3,663181 | 0,000249 | 0,014343 |
| 4423  | ENSG00000083720 | OXCT1      | 120,0899 | 1,692804 | 0,424835 | 3,984615 | 6,76E-05 | 0,005324 |
| 9652  | ENSG00000064651 | SLC12A2    | 93,14226 | 1,666213 | 0,487215 | 3,419874 | 0,000627 | 0,02929  |
| 8111  | ENSG00000008394 | MGST1      | 247,8585 | 1,569946 | 0,360876 | 4,350375 | 1,36E-05 | 0,001598 |
| 6383  | ENSG00000086289 | EPDR1      | 182,0248 | 1,536647 | 0,3701   | 4,151978 | 3,30E-05 | 0,003106 |
| 8046  | ENSG00000277443 | MARCKS     | 596,8557 | 1,448232 | 0,282767 | 5,121644 | 3,03E-07 | 6,31E-05 |
| 2391  | ENSG00000005469 | CROT       | 422,0149 | 1,439914 | 0,32478  | 4,433505 | 9,27E-06 | 0,001159 |
| 1529  | ENSG00000186767 | SPIN4      | 205,4277 | 1,418541 | 0,374528 | 3,787546 | 0,000152 | 0,010207 |
| 303   | ENSG00000135333 | EPHA7      | 344,2036 | 1,3921   | 0,288829 | 4,819807 | 1,44E-06 | 0,000259 |
| 600   | ENSG00000163191 | S100A11    | 1240,455 | 1,330593 | 0,23839  | 5,581585 | 2,38E-08 | 6,02E-06 |
| 11478 | ENSG00000213064 | SFT2D2     | 1125,942 | 1,272244 | 0,216106 | 5,887126 | 3,93E-09 | 1,17E-06 |
| 770   | ENSG00000116741 | RGS2       | 2301,152 | 1,25497  | 0,227015 | 5,528136 | 3,24E-08 | 7,84E-06 |
| 1485  | ENSG00000138814 | PPP3CA     | 519,7102 | 1,250757 | 0,233256 | 5,362169 | 8,22E-08 | 1,78E-05 |
| 13942 | ENSG00000172292 | CERS6      | 1331,119 | 1,224855 | 0,315515 | 3,882087 | 0,000104 | 0,007499 |
| 8395  | ENSG00000167749 | KLK4       | 1065,725 | 1,224585 | 0,238463 | 5,13533  | 2,82E-07 | 5,97E-05 |
| 2750  | ENSG00000122778 | KIAA1549   | 661,1372 | 1,212489 | 0,343744 | 3,5273   | 0,00042  | 0,021303 |
| 4972  | ENSG00000242265 | PEG10      | 4379,002 | 1,16152  | 0,178629 | 6,502402 | 7,90E-11 | 3,03E-08 |
| 1397  | ENSG00000122126 | OCRL       | 375,045  | 1,134282 | 0,337578 | 3,360065 | 0,000779 | 0,032355 |
| 902   | ENSG00000122952 | ZWINT      | 291,4961 | 1,105179 | 0,31493  | 3,509291 | 0,000449 | 0,022324 |
| 12342 | ENSG00000185432 | METTL7A    | 755,6806 | 1,074476 | 0,268187 | 4,006443 | 6,16E-05 | 0,005083 |
| 4658  | ENSG00000111666 | CHPT1      | 417,6465 | 1,069874 | 0,250211 | 4,275891 | 1,90E-05 | 0,002055 |
| 7441  | ENSG00000198830 | HMGN2      | 977,3378 | 1,066272 | 0,254828 | 4,184277 | 2,86E-05 | 0,002786 |
| 4187  | ENSG00000067113 | PLPP1      | 926,2904 | 1,034213 | 0,233207 | 4,434747 | 9,22E-06 | 0,001159 |
| 5641  | ENSG00000005421 | PON1       | 398,6208 | 1,02421  | 0,273488 | 3,744987 | 0,00018  | 0,011216 |

|       |                 |               |          |          |          |          |          |          |
|-------|-----------------|---------------|----------|----------|----------|----------|----------|----------|
| 1893  | ENSG00000158270 | COLEC12       | 529,589  | 1,009609 | 0,258228 | 3,909751 | 9,24E-05 | 0,006891 |
| 3707  | ENSG00000094916 | CBX5          | 468,9138 | 1,002368 | 0,249385 | 4,019363 | 5,84E-05 | 0,004846 |
| 8385  | ENSG00000113368 | LMNB1         | 552,6418 | 0,989524 | 0,281065 | 3,520617 | 0,000431 | 0,021482 |
| 1800  | ENSG00000153179 | RASSF3        | 948,6726 | 0,825223 | 0,220164 | 3,748218 | 0,000178 | 0,011216 |
| 1992  | ENSG00000065978 | YBX1          | 1179,801 | 0,698894 | 0,205437 | 3,401985 | 0,000669 | 0,03018  |
| 9640  | ENSG00000180777 | ANKRD30B      | 17,0198  | 7,588849 | 1,840009 | 4,124355 | 3,72E-05 | 0,003449 |
| 12769 | ENSG00000117472 | TSPAN1        | 15,42557 | 7,486974 | 1,701086 | 4,40129  | 1,08E-05 | 0,001317 |
| 11719 | ENSG00000143184 | XCL1          | 14,54206 | 7,393124 | 1,728379 | 4,277491 | 1,89E-05 | 0,002055 |
| 1561  | ENSG00000164683 | HEY1          | 12,54119 | 7,146286 | 2,109288 | 3,388009 | 0,000704 | 0,031195 |
| 1123  | ENSG00000104267 | CA2           | 11,73903 | 7,053702 | 1,992853 | 3,5395   | 0,000401 | 0,020519 |
| 818   | ENSG00000131781 | FMO5          | 20,99065 | 6,985363 | 1,661807 | 4,203475 | 2,63E-05 | 0,002645 |
| 8853  | ENSG00000176136 | MC5R          | 10,03064 | 6,856186 | 1,900074 | 3,608378 | 0,000308 | 0,016631 |
| 10675 | ENSG00000206549 | PRSS50        | 8,562322 | 6,600207 | 1,994477 | 3,309242 | 0,000935 | 0,03596  |
| 11094 | ENSG00000156298 | TSPAN7        | 7,618839 | 6,455481 | 2,01285  | 3,207134 | 0,001341 | 0,048315 |
| 4098  | ENSG00000185272 | RBM11         | 13,95014 | 6,362168 | 1,74197  | 3,652283 | 0,00026  | 0,014628 |
| 5239  | ENSG00000185261 | KIAA0825      | 13,05377 | 6,275905 | 1,69382  | 3,705178 | 0,000211 | 0,012552 |
| 2163  | ENSG00000213918 | DNASE1        | 13,53557 | 6,241592 | 1,747841 | 3,57103  | 0,000356 | 0,018851 |
| 1368  | ENSG00000173588 | CEP83         | 22,09569 | 5,862043 | 1,474347 | 3,976027 | 7,01E-05 | 0,005475 |
| 12398 | ENSG00000186377 | CYP4X1        | 30,56574 | 5,362701 | 1,520819 | 3,526192 | 0,000422 | 0,021303 |
| 8655  | ENSG00000259030 | FPGT-TNNI3K   | 24,44212 | 5,34166  | 1,279855 | 4,173645 | 3,00E-05 | 0,002894 |
| 1311  | ENSG00000136698 | CFC1          | 119,7602 | 5,097416 | 0,728931 | 6,993002 | 2,69E-12 | 1,33E-09 |
| 3376  | ENSG00000114790 | ARHGEF26      | 21,48277 | 5,039957 | 1,438744 | 3,503025 | 0,00046  | 0,022761 |
| 8847  | ENSG00000166263 | STXBP4        | 18,4807  | 4,947108 | 1,463474 | 3,380387 | 0,000724 | 0,031787 |
| 6986  | ENSG00000172348 | RCAN2         | 39,9507  | 4,25598  | 0,90688  | 4,692993 | 2,69E-06 | 0,000432 |
| 4990  | ENSG00000241399 | CD302         | 33,97768 | 4,079407 | 1,124215 | 3,628671 | 0,000285 | 0,015756 |
| 641   | ENSG00000103534 | TMC5          | 16,70878 | 4,057408 | 1,240753 | 3,270118 | 0,001075 | 0,039769 |
| 1552  | ENSG00000179111 | HES7          | 78,83306 | 4,033664 | 0,695261 | 5,801651 | 6,57E-09 | 1,90E-06 |
| 2518  | ENSG00000276302 | AL021997.3    | 17,67669 | 4,013129 | 1,162075 | 3,453417 | 0,000554 | 0,026505 |
| 8690  | ENSG00000254685 | FPGT          | 24,86006 | 3,834495 | 1,08426  | 3,536509 | 0,000405 | 0,020664 |
| 3088  | ENSG00000205642 | VCX3B         | 46,99879 | 3,633071 | 1,021057 | 3,558148 | 0,000373 | 0,019452 |
| 3841  | ENSG00000089682 | RBM41         | 43,94149 | 3,552653 | 0,817304 | 4,346797 | 1,38E-05 | 0,001608 |
| 1602  | ENSG00000196350 | ZNF729        | 72,01157 | 3,421883 | 0,676971 | 5,054693 | 4,31E-07 | 8,39E-05 |
| 6203  | ENSG00000145569 | FAM105A       | 65,08151 | 3,407492 | 0,629401 | 5,413863 | 6,17E-08 | 1,38E-05 |
| 8952  | ENSG00000164253 | WDR41         | 41,71908 | 2,890822 | 0,850984 | 3,397037 | 0,000681 | 0,030525 |
| 3297  | ENSG00000169860 | P2RY1         | 83,25948 | 2,880357 | 0,610399 | 4,718812 | 2,37E-06 | 0,000392 |
| 6215  | ENSG00000198157 | HMGN5         | 90,73607 | 2,661225 | 0,665505 | 3,998804 | 6,37E-05 | 0,005132 |
| 5884  | ENSG00000102265 | TIMP1         | 83,9389  | 2,642584 | 0,648427 | 4,075375 | 4,59E-05 | 0,004011 |
| 6671  | ENSG00000258289 | CHURC1        | 58,11513 | 2,593852 | 0,692992 | 3,742974 | 0,000182 | 0,011248 |
| 11025 | ENSG00000113369 | ARRDC3        | 78,13943 | 2,541054 | 0,562614 | 4,516516 | 6,29E-06 | 0,000868 |
| 305   | ENSG00000197121 | PGAP1         | 55,79693 | 2,492875 | 0,775385 | 3,215016 | 0,001304 | 0,047224 |
| 244   | ENSG00000153132 | CLGN          | 255,2119 | 2,46399  | 0,373444 | 6,598022 | 4,17E-11 | 1,71E-08 |
| 3311  | ENSG00000164684 | ZNF704        | 58,89251 | 2,442828 | 0,613122 | 3,984247 | 6,77E-05 | 0,005324 |
| 7255  | ENSG00000196604 | POTEF         | 64,98563 | 2,326337 | 0,572669 | 4,062274 | 4,86E-05 | 0,004212 |
| 1399  | ENSG00000213123 | TCTEX1D2      | 89,34193 | 2,251005 | 0,546737 | 4,117165 | 3,84E-05 | 0,003531 |
| 13781 | ENSG00000135747 | ZNF670-ZNF695 | 109,5411 | 2,124594 | 0,599995 | 3,541023 | 0,000399 | 0,02049  |

|       |                 |            |          |          |          |          |          |          |
|-------|-----------------|------------|----------|----------|----------|----------|----------|----------|
| 9470  | ENSG00000169570 | DTWD2      | 47,45386 | 2,094048 | 0,63575  | 3,293825 | 0,000988 | 0,037497 |
| 339   | ENSG00000133739 | LRRCC1     | 149,3605 | 2,084193 | 0,533236 | 3,908574 | 9,28E-05 | 0,006891 |
| 11816 | ENSG00000113810 | SMC4       | 119,646  | 2,042676 | 0,575619 | 3,548662 | 0,000387 | 0,019991 |
| 12552 | ENSG00000186871 | ERCC6L     | 78,26302 | 2,005405 | 0,600456 | 3,339804 | 0,000838 | 0,033634 |
| 2618  | ENSG00000184831 | APOO       | 64,96834 | 1,872036 | 0,550209 | 3,402406 | 0,000668 | 0,03018  |
| 9356  | ENSG00000111816 | FRK        | 241,7118 | 1,849643 | 0,458803 | 4,031456 | 5,54E-05 | 0,004702 |
| 9338  | ENSG00000134001 | EIF2S1     | 274,1707 | 1,712523 | 0,399222 | 4,289653 | 1,79E-05 | 0,001968 |
| 7199  | ENSG00000196776 | CD47       | 228,6848 | 1,708606 | 0,363849 | 4,695921 | 2,65E-06 | 0,000432 |
| 591   | ENSG00000179941 | BBS10      | 204,9304 | 1,634229 | 0,500009 | 3,268398 | 0,001082 | 0,039887 |
| 9869  | ENSG00000147592 | LACTB2     | 146,0721 | 1,58823  | 0,483271 | 3,286417 | 0,001015 | 0,038237 |
| 5084  | ENSG00000110315 | RNF141     | 156,7792 | 1,575879 | 0,393638 | 4,003374 | 6,24E-05 | 0,005114 |
| 1070  | ENSG00000105793 | GTPBP10    | 134,1165 | 1,536299 | 0,458971 | 3,34727  | 0,000816 | 0,03319  |
| 1169  | ENSG00000172785 | CBWD1      | 275,2998 | 1,489492 | 0,406716 | 3,662244 | 0,00025  | 0,014343 |
| 8142  | ENSG00000151366 | NDUFC2     | 176,1639 | 1,400059 | 0,41941  | 3,338162 | 0,000843 | 0,03372  |
| 4067  | ENSG00000135317 | SNX14      | 220,0035 | 1,330357 | 0,387555 | 3,432695 | 0,000598 | 0,028274 |
| 12514 | ENSG00000112893 | MAN2A1     | 219,6208 | 1,327483 | 0,319589 | 4,153718 | 3,27E-05 | 0,003106 |
| 8090  | ENSG00000197969 | VPS13A     | 177,3218 | 1,309205 | 0,353363 | 3,704982 | 0,000211 | 0,012552 |
| 7619  | ENSG00000102531 | FNDC3A     | 268,6337 | 1,308546 | 0,354874 | 3,687353 | 0,000227 | 0,013255 |
| 11959 | ENSG00000180776 | ZDHHC20    | 293,3394 | 1,297501 | 0,377403 | 3,437976 | 0,000586 | 0,027839 |
| 4259  | ENSG00000271793 | AL589666.1 | 275,1721 | 1,287871 | 0,37019  | 3,478949 | 0,000503 | 0,0246   |
| 11116 | ENSG00000131711 | MAP1B      | 491,061  | 1,1983   | 0,310997 | 3,853088 | 0,000117 | 0,008196 |
| 11211 | ENSG00000136824 | SMC2       | 406,104  | 1,17058  | 0,346785 | 3,375517 | 0,000737 | 0,031915 |
| 11545 | ENSG00000206527 | HACD2      | 375,6288 | 1,142093 | 0,344153 | 3,318558 | 0,000905 | 0,035579 |
| 9094  | ENSG00000148773 | MKI67      | 278,9055 | 1,127511 | 0,314204 | 3,58847  | 0,000333 | 0,017792 |
| 4384  | ENSG00000142166 | IFNAR1     | 252,2618 | 1,11847  | 0,295679 | 3,782717 | 0,000155 | 0,010349 |
| 11157 | ENSG00000152402 | GUCY1A2    | 1165,221 | 1,115939 | 0,223204 | 4,99964  | 5,74E-07 | 0,00011  |
| 13185 | ENSG00000242028 | HYPK       | 305,6784 | 1,064855 | 0,311592 | 3,417463 | 0,000632 | 0,029379 |
| 2510  | ENSG00000116704 | SLC35D1    | 364,915  | 1,026592 | 0,299251 | 3,430538 | 0,000602 | 0,028386 |
| 1491  | ENSG00000283149 | AC068631.2 | 629,7906 | 1,001547 | 0,259537 | 3,858975 | 0,000114 | 0,008097 |
| 12145 | ENSG00000120738 | EGR1       | 785,334  | 0,995666 | 0,228188 | 4,363364 | 1,28E-05 | 0,001521 |
| 5537  | ENSG00000112697 | TMEM30A    | 578,483  | 0,995563 | 0,26802  | 3,714511 | 0,000204 | 0,012268 |
| 12122 | ENSG00000203667 | COX20      | 400,4576 | 0,965327 | 0,284857 | 3,388813 | 0,000702 | 0,031195 |
| 2279  | ENSG00000138413 | IDH1       | 778,2672 | 0,957282 | 0,264299 | 3,621969 | 0,000292 | 0,016074 |
| 2777  | ENSG00000197147 | LRRC8B     | 382,4701 | 0,937904 | 0,278859 | 3,363364 | 0,00077  | 0,032298 |
| 11101 | ENSG00000143368 | SF3B4      | 588,6688 | 0,910134 | 0,282757 | 3,21878  | 0,001287 | 0,046751 |
| 690   | ENSG00000152291 | TGOLN2     | 807,7847 | 0,846768 | 0,252907 | 3,348135 | 0,000814 | 0,03319  |
| 1429  | ENSG00000090520 | DNAJB11    | 801,9142 | 0,782291 | 0,207345 | 3,772903 | 0,000161 | 0,010471 |
| 3126  | ENSG00000205189 | ZBTB10     | 2590,004 | 0,659706 | 0,182556 | 3,613724 | 0,000302 | 0,016435 |

|              |  |              |  |
|--------------|--|--------------|--|
| MZIP-152     |  | MZIP-99b     |  |
| MZIP182      |  | MZIplet7a    |  |
| MZIP193b     |  | redo2963p    |  |
| MZIP-199b-3p |  | Bullet34a1   |  |
| MZIP19a      |  | Bullet34a2   |  |
| MZIP-19b     |  | MZIP125a-3p  |  |
| MZIP200a     |  | MZIP125a-5p  |  |
| MZIP200c     |  | MZIP125b     |  |
| MZIP203      |  | MZIP133b     |  |
| MZIP221      |  | MZIP146a     |  |
| MZIP222      |  | MZIP-146b_3p |  |
| MZIP224      |  | MZIP-146b_5p |  |
| MZIP24       |  | MZIP-152     |  |
| MZIP-25      |  | MZIP182      |  |
| MZIP27a      |  | MZIP193b     |  |
| MZIP296-3p   |  | MZIP-199b-3p |  |
| MZIP302b     |  | MZIP19a      |  |
| MZIP302c     |  | MZIP-19b     |  |
| MZIP31       |  | MZIP200b     |  |
| MZIP365      |  | MZIP200c     |  |
| MZIP371-3p   |  | MZIP221      |  |
| MZIP372      |  | MZIP222      |  |
| MZIP92a      |  | MZIP224      |  |
| MZIP27b      |  | MZIP24       |  |
| MZIP31*      |  | MZIP-25      |  |
| MZIP33a      |  | MZIP296-3p   |  |
| MZIP188_3P   |  | MZIP30c      |  |
| MZIP200b     |  | MZIP31       |  |
| MZIP483_3p   |  | MZIP31*      |  |
| MZIP378      |  | MZIP33a      |  |
| MZIP519c3p   |  | MZIP365      |  |
| Bullet34a1   |  | MZIP371-3p   |  |
| Bullet34a2   |  | MZIP372      |  |
| MZIP30b      |  | MZIP378      |  |
| MZIP675      |  | MZIP483_3p   |  |
| MZIPA2       |  | MZIP4995p    |  |
| MZIP4995p    |  | MZIP519c3p   |  |
| MZIP30c      |  | MZIP96       |  |
| MZIP96       |  | MZIPA2       |  |
